# Supplementary material for: The molecular origin and taxonomy of mucinous ovarian carcinoma
Source: PubMed Central journal article supplement (PMC6718426; doi:10.1038/s41467-019-11862-x), 2019-09-02
Supplement: 41467_2019_11862_MOESM1_ESM.pdf [file 41467_2019_11862_MOESM1_ESM.pdf]

**Supplementary Information for Cheasley *et al.***

***The Molecular Origin and Taxonomy of Mucinous Ovarian Carcinoma.***

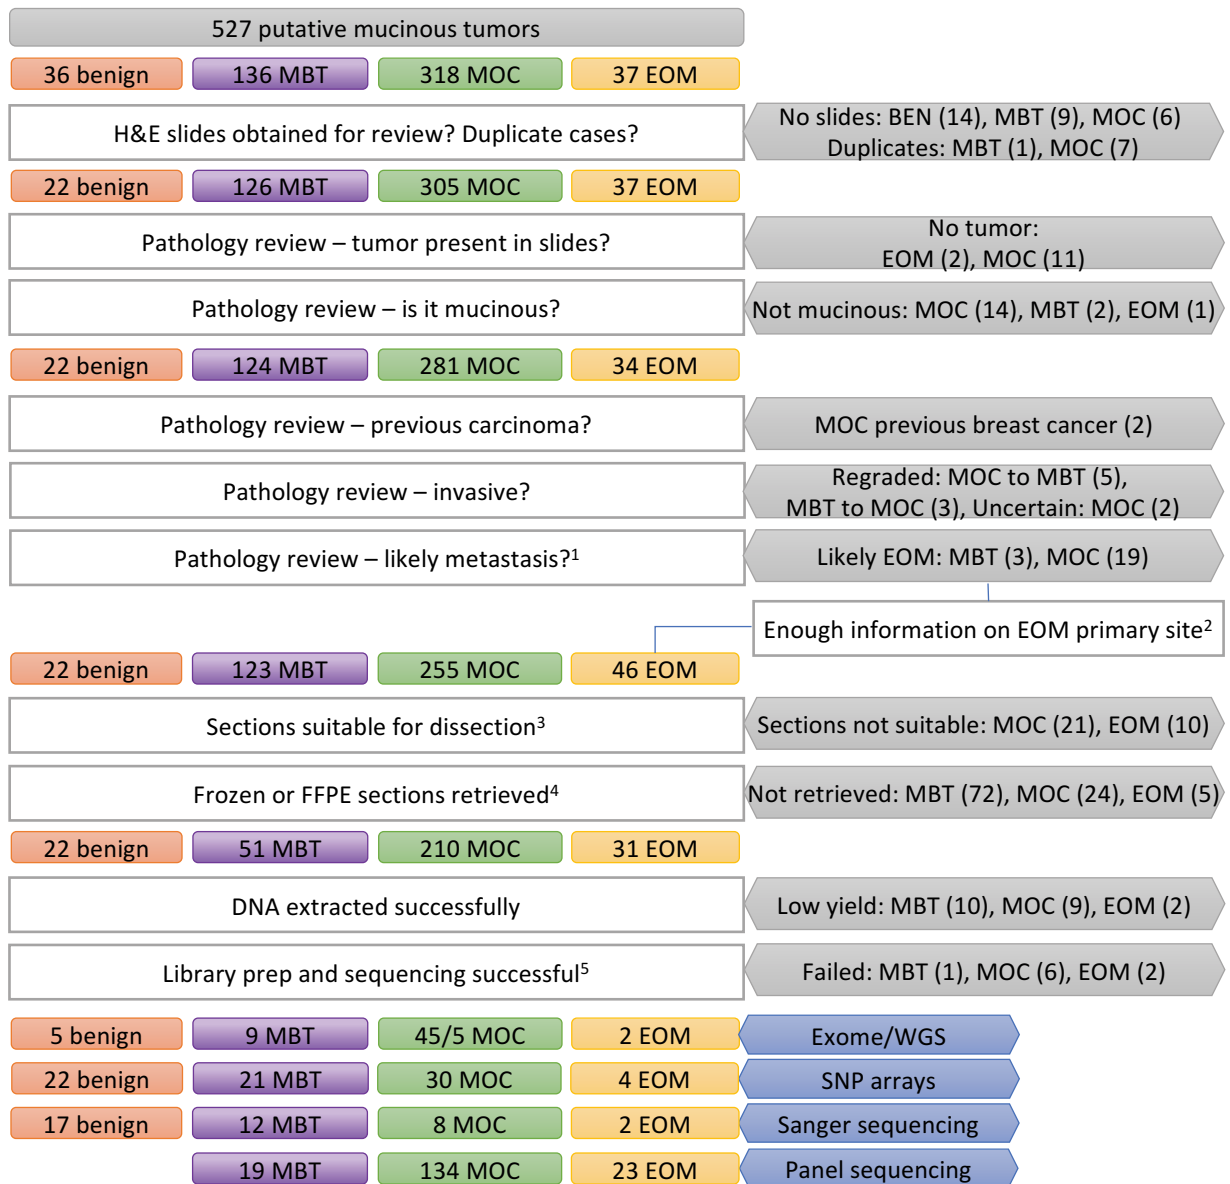

### Supplementary Figure 1.

REMARK diagram showing selection for primary mucinous ovarian tumours for discovery and validation sequencing. MBT – mucinous borderline tumor; MOC – mucinous ovarian carcinoma; EOM – extra-ovarian metastatic disease

1. Metastatic disease was determined on an integrated assessment combining histopathological features, immunohistochemistry and clinical information including outcome. Cases where the metastatic status was uncertain were excluded as MOC.

2. Some cases were re-classed as EOM when the primary site could be determined.

3. Unsuitable sections included those with no invasive disease present (for MOC), scanty tumor unlikely to yield enough DNA, or a dissection unlikely to yield >50% tumor epithelial cells (e.g. highly infiltrative EOM cases).

4. Frozen tissues were prioritized, and DNA extracted from these was used for exome/whole genome (WGS) sequencing. Formalin-fixed, paraffin-embedded (FFPE) tissues were only requested from AOCS, COEUR, Queensland, Southern, VCB and Edinburgh as these were the largest collections and with the most detailed clinical information available. MBT and EOM cases were not prioritized for FFPE tissue collection.

5. Benign data as well as Sanger sequencing and SNP array data were pre-existing from our previous studies (Hunter et al., 2013, Ryland et al., 2015). Some MBT (n=8), EOM (n=2) and MOC (n=11) data were previously obtained by exome sequencing (Ryland et al., 2015). New EOM and MBT cases were prioritized for panel sequencing.

Source data for this figure provided in the Source Data file.

## Supplementary Note 1

### a. Survival analysis – source data in Supplementary Data 1

1. Univariate analysis of clinicopathological parameters across MBT, MOC and EOM

#### a. Supplementary Table 1 - Disease-specific overall survival

| Factor         |            | HR    | 95% CI       | P value  |
|----------------|------------|-------|--------------|----------|
| Classification | MBT        | 1     |              |          |
|                | MOC        | 6.24  | 1.93-20.15   | 0.002    |
|                | EOM        | 47.44 | 13.74-163.76 | 1.02E-09 |
| Grade          | MOC G1     | 1     |              |          |
|                | MOC G2     | 1.17  | 0.58-2.34    | 0.66     |
|                | MOC G3     | 4.05  | 1.85-8.83    | 0.0004   |
|                | MBT        | 0.2   | 0.06-0.7     | 0.012    |
|                | EOM        | 10.3  | 4.94-21.47   | 4.99E-10 |
| FIGO Stage     | MBT        | 1     |              |          |
|                | MOC I      | 3.27  | 0.96-11.11   | 0.057    |
|                | MOC II     | 4.88  | 0.98-24.35   | 0.053    |
|                | MOC III-IV | 33.15 | 9.8-112.21   | 1.82E-08 |
|                | EOM        | 48.96 | 14.18-169.01 | 7.48E-10 |
| Age (years)    |            | 1.01  | 0.99-1.03    | 0.158    |

#### Supplementary Figure 2 - Disease-specific overall survival

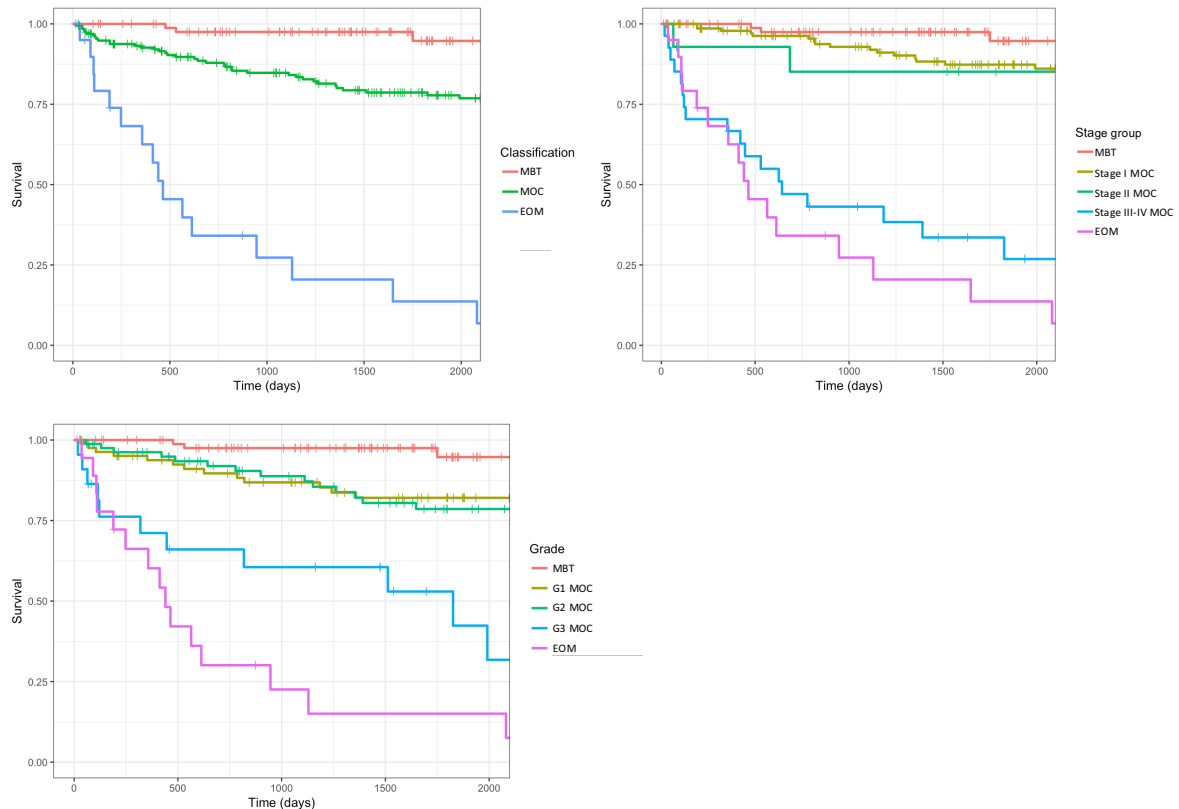

**b. Supplementary Table 2 - Progression-free survival**

| Factor         |            | HR    | 95% CI      | P value  |
|----------------|------------|-------|-------------|----------|
| Classification | MBT        | 1     |             |          |
|                | MOC        | 4.64  | 1.83-11.76  | 0.001    |
|                | EOM        | 34.5  | 12.46-95.49 | 9.33E-12 |
| Grade          | MOC G1     | 1     |             |          |
|                | MOC G2     | 0.95  | 0.46-1.98   | 0.898    |
|                | MOC G3     | 4.22  | 1.98-9.02   | 0        |
|                | MBT        | 0.27  | 0.1-0.76    | 0.013    |
|                | EOM        | 10.6  | 4.99-22.52  | 8.41E-10 |
| FIGO Stage     | MBT        | 1     |             |          |
|                | MOC I      | 2.59  | 0.97-6.94   | 0.058    |
|                | MOC II     | 5.01  | 1.34-18.71  | 0.017    |
|                | MOC III-IV | 24.01 | 8.76-65.78  | 6.37E-10 |
|                | EOM        | 35.88 | 12.93-99.54 | 6.15E-12 |
| Age (years)    |            | 0.99  | 0.97-1.01   | 0.447    |

**Supplementary Figure 3 - Progression-free survival**

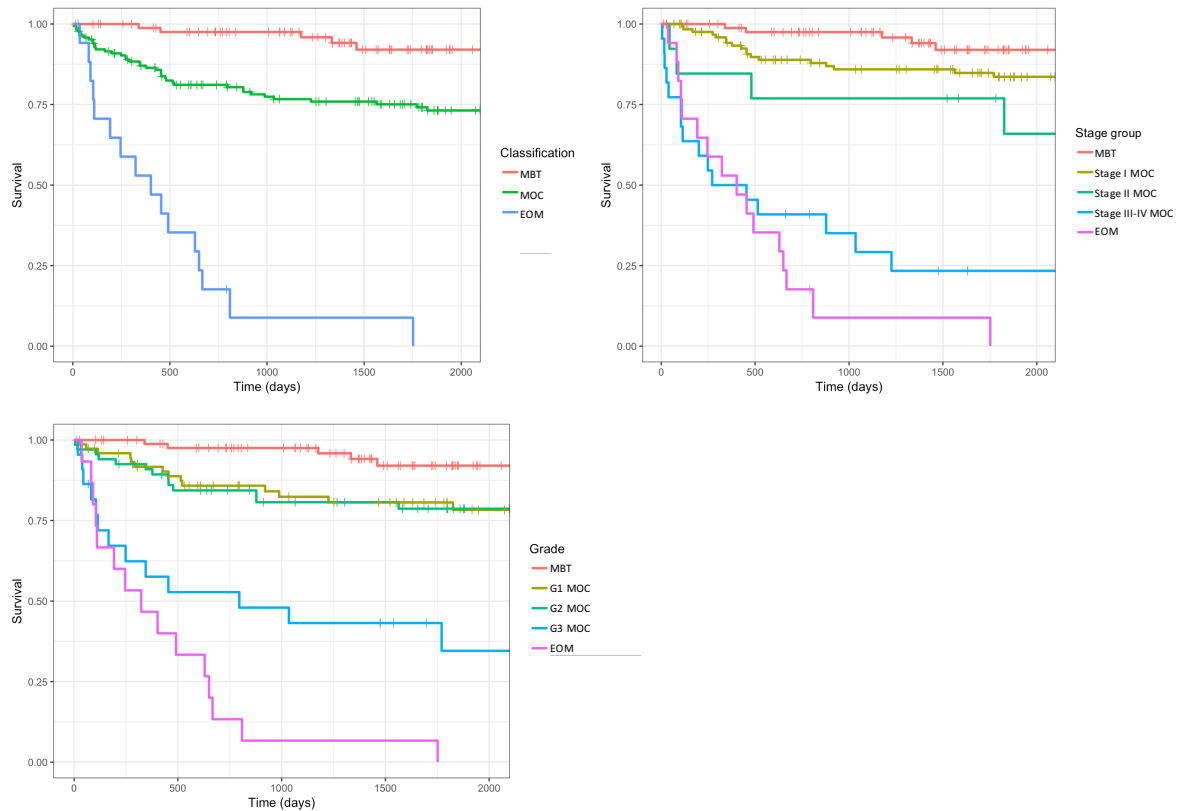

2. Univariate analysis of clinicopathological and genetic parameters within MOC

a. **Supplementary Table 3 - Disease-specific overall survival, MOC only**

| <b>Factor</b>       |                     | <b>HR</b> | <b>95% CI</b> | <b>P value</b> |
|---------------------|---------------------|-----------|---------------|----------------|
| Grade               | MOC G1              | 1         |               |                |
|                     | MOC G2              | 1.11      | 0.55-2.25     | 0.772          |
|                     | MOC G3              | 3.92      | 1.79-8.55     | 0.001          |
| FIGO Stage          | I                   | 1         |               |                |
|                     | II                  | 1.48      | 0.44-5.02     | 0.526          |
|                     | III                 | 9.8       | 5.01-19.15    | 2.49E-11       |
|                     | IV                  | 12.03     | 2.77-52.3     | 0.001          |
| Age (years)         | Age                 | 1.01      | 0.99-1.03     | 0.299          |
| CN type             | Complex             | 1         |               |                |
|                     | Complex (whole chr) | 0.2       | 0.03-1.53     | 0.122          |
|                     | Complex + amps      | 0.65      | 0.34-1.26     | 0.2            |
|                     | Simple              | 0.12      | 0.03-0.51     | 0.004          |
|                     | Simple + amp        | 0.24      | 0.05-1.03     | 0.055          |
| FGA                 | ≤10%                | 1         |               |                |
|                     | >10%                | 5.14      | 1.83-14.42    | 0.002          |
| KRAS                | MUT                 | 1         |               |                |
|                     | WT                  | 0.53      | 0.26-1.12     | 0.097          |
| TP53                | MUT                 | 1         |               |                |
|                     | WT                  | 0.89      | 0.46-1.73     | 0.737          |
| ERBB2 amplification | Amplified           | 1         |               |                |
|                     | Not amplified       | 2.14      | 0.95-4.82     | 0.066          |
| CDKN2A Loss/LOH     | No                  | 1         |               |                |
|                     | Yes                 | 2.88      | 1.21-6.86     | 0.017          |
| chr9p               | Not amplified       | 1         |               |                |
|                     | Amplified           | 2.2487    | 1.04-4.863    | 0.040          |

### Supplementary Figure 4 - Disease-specific overall survival, MOC only

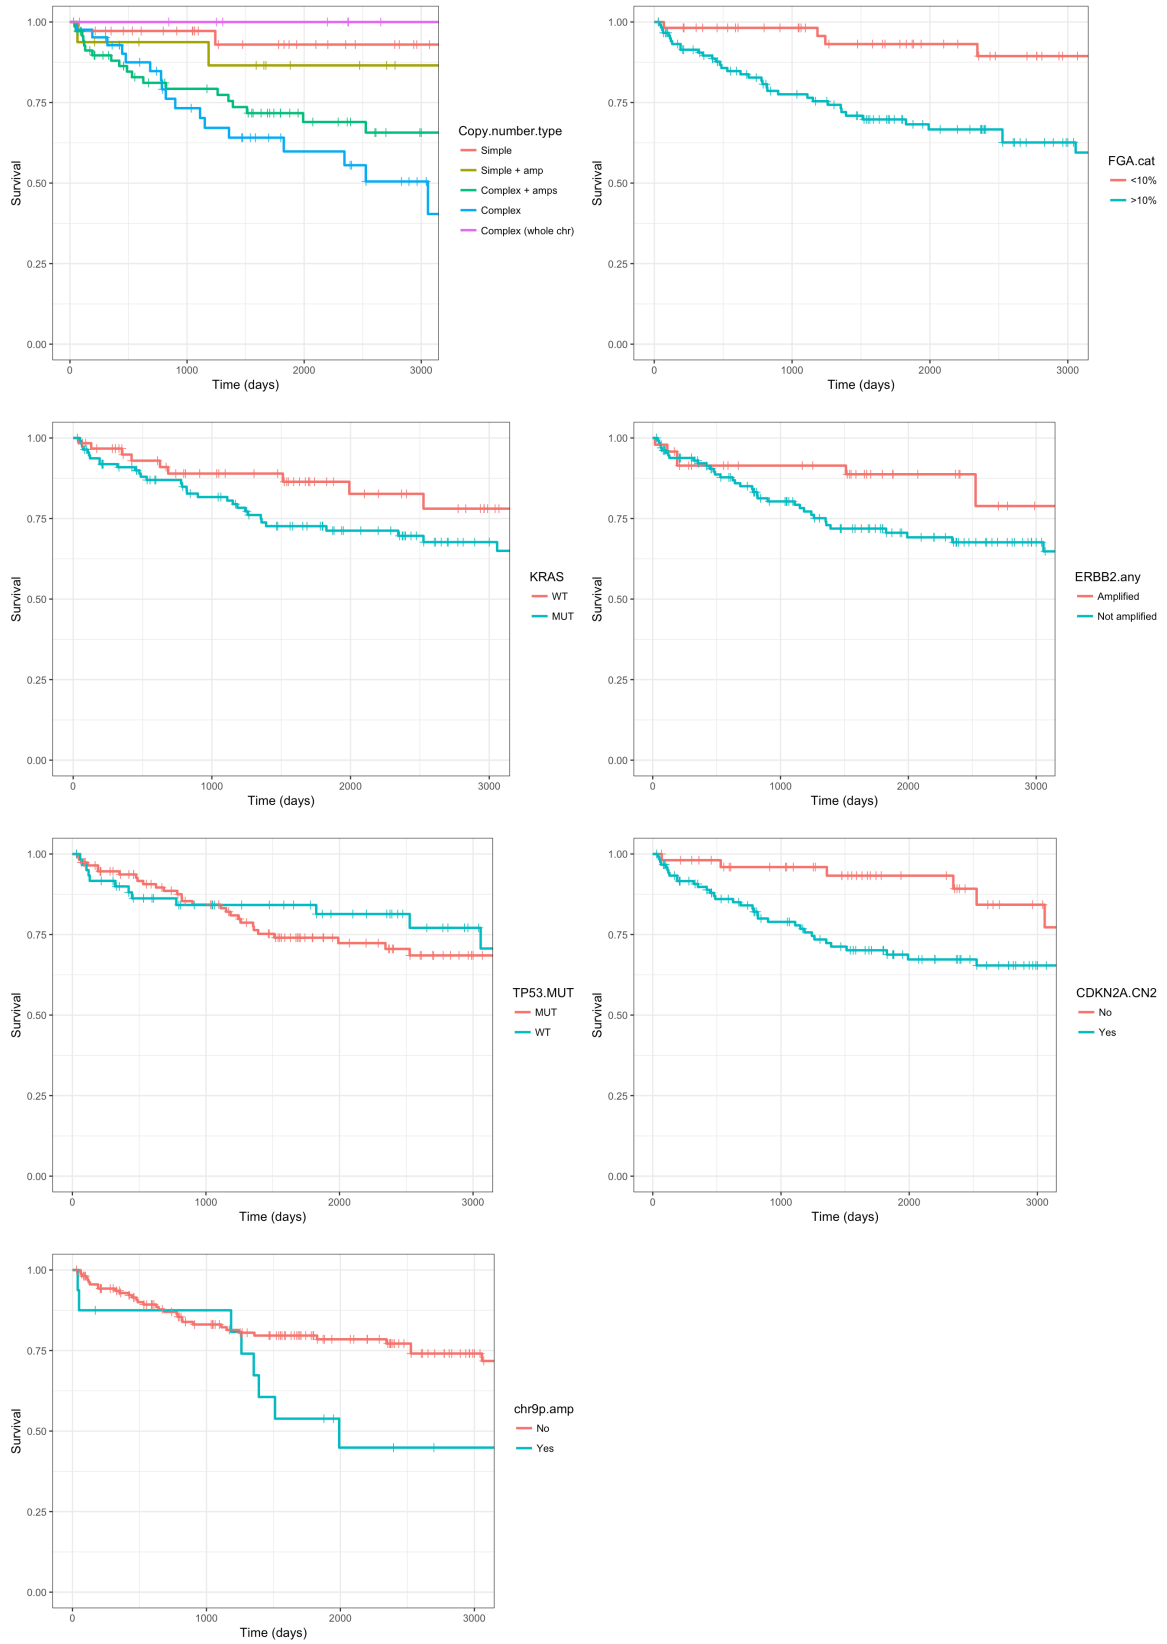

**b. Supplementary Table 4 - Progression-free survival, MOC only**

| <b>Factor</b>       |                     | <b>HR</b> | <b>95% CI</b> | <b>P value</b> |
|---------------------|---------------------|-----------|---------------|----------------|
| Grade               | MOC G1              | 1         |               |                |
|                     | MOC G2              | 0.91      | 0.43-1.9      | 0.792          |
|                     | MOC G3              | 4.1       | 1.92-8.78     | 0.0003         |
| FIGO Stage          | I                   | 1         |               |                |
|                     | II                  | 1.96      | 0.67-5.75     | 0.218          |
|                     | III                 | 8.43      | 4.19-16.94    | 2.19E-09       |
|                     | IV                  | 10.31     | 2.38-44.72    | 0.002          |
| Age (years)         | Age                 | 0.99      | 0.97-1.01     | 0.306          |
| CN type             | Complex             | 1         |               |                |
|                     | Complex (whole chr) | 0.25      | 0.03-1.91     | 0.184          |
|                     | Complex + amps      | 0.79      | 0.4-1.56      | 0.499          |
|                     | Simple              | 0.08      | 0.01-0.59     | 0.013          |
|                     | Simple + amp        | 0.55      | 0.18-1.66     | 0.291          |
| FGA                 | ≤10%                | 1         |               |                |
|                     | >10%                | 4.83      | 1.72-13.6     | 0.003          |
| KRAS                | MUT                 | 1         |               |                |
|                     | WT                  | 0.53      | 0.25-1.11     | 0.091          |
| TP53                | MUT                 | 1         |               |                |
|                     | WT                  | 0.72      | 0.35-1.47     | 0.368          |
| ERBB2 amplification | Amplified           | 1         |               |                |
|                     | Not amplified       | 1.73      | 0.8-3.75      | 0.162          |
| CDKN2A Loss/LOH     | No                  | 1         |               |                |
|                     | Yes                 | 3.44      | 1.35-8.78     | 0.010          |
| chr9p               | Not amplified       | 1         |               |                |
|                     | Amplified           | 2.39      | 1.10-5.17     | 0.027          |

## Supplementary Figure 5 - Progression-free survival, MOC only

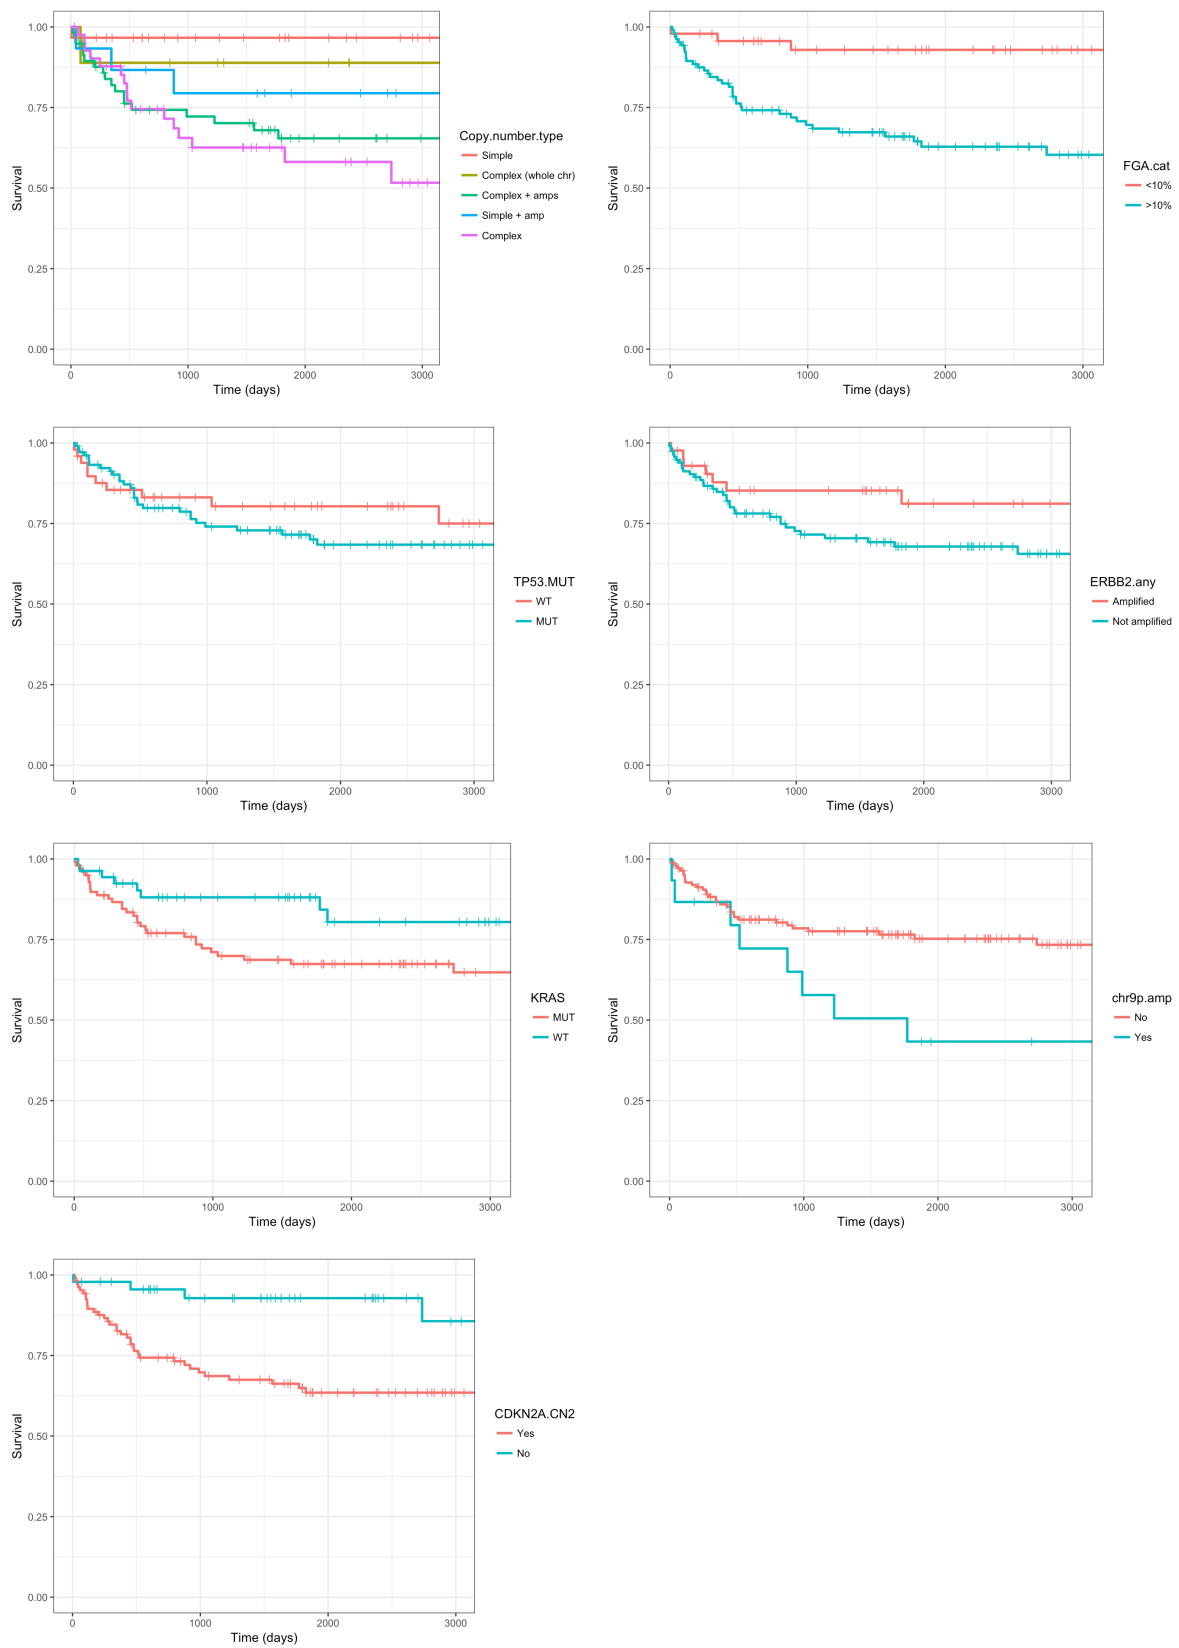



### 3. Akaike information criterion (AIC) multivariate modelling within MOC for disease-specific overall survival

```
Scope=list(upper=~(chr9p.amp+Copy.number.type+FGA.cat+CDKN2A.CN2+Grade+Stage.group+ERBB2.any+KRAS+TP53.MUT)^2,lower~1)
phm_0 = coxph(Surv(OS.days,DSS.Status)~1,na.action=na.exclude)
phm_f = stepAIC(phm_0,Scope,direction="both")
```

```
## Start: AIC=343.38
## Surv(OS.days, DSS.Status) ~ 1
##
##           Df      AIC
## + Stage.group      3 319.56
## + FGA.cat          1 333.77
## + Copy.number.type  4 337.21
## + Grade            2 337.73
## + CDKN2A.CN2       1 339.64
## + chr9p.amp        1 341.57
## + KRAS              1 342.27
## + ERBB2.any        1 342.33
## <none>              343.38
## + TP53.MUT         1 345.11
##
## Step: AIC=319.56
## Surv(OS.days, DSS.Status) ~ Stage.group
##
##           Df      AIC
## + CDKN2A.CN2       1 311.64
## + Copy.number.type  4 312.53
## + FGA.cat          1 312.94
## + KRAS              1 317.98
## + TP53.MUT         1 318.59
## + chr9p.amp        1 318.65
## + ERBB2.any        1 319.50
## <none>              319.56
## + Grade            2 321.13
## - Stage.group      3 343.38
##
## Step: AIC=311.64
## Surv(OS.days, DSS.Status) ~ Stage.group + CDKN2A.CN2
##
##           Df      AIC
## + FGA.cat          1 308.45
## + Copy.number.type  4 309.89
## + ERBB2.any        1 310.15
## + KRAS              1 310.19
## + Grade            2 310.79
## <none>              311.64
## + chr9p.amp        1 313.09
## + TP53.MUT         1 313.42
## + CDKN2A.CN2:Stage.group  2 314.67
## - CDKN2A.CN2       1 319.56
## - Stage.group      3 339.64
##
## Step: AIC=308.45
## Surv(OS.days, DSS.Status) ~ Stage.group + CDKN2A.CN2 + FGA.cat
##
##           Df      AIC
## + ERBB2.any        1 305.35
## + KRAS              1 305.85
```

```

## + Grade                2 307.05
## <none>                  308.45
## + chr9p.amp             1 309.64
## + FGA.cat:CDKN2A.CN2   1 309.74
## + TP53.MUT              1 310.40
## + Copy.number.type      4 311.01
## + FGA.cat:Stage.group   2 311.47
## + CDKN2A.CN2:Stage.group 2 311.47
## - FGA.cat               1 311.64
## - CDKN2A.CN2            1 312.94
## - Stage.group           3 332.72
##
## Step:  AIC=305.35
## Surv(OS.days, DSS.Status) ~ Stage.group + CDKN2A.CN2 + FGA.cat +
##   ERBB2.any
##
##                Df      AIC
## + Grade                2 304.28
## + KRAS                  1 304.73
## <none>                  305.35
## + FGA.cat:CDKN2A.CN2   1 306.56
## + chr9p.amp             1 306.77
## + FGA.cat:ERBB2.any     1 306.80
## + CDKN2A.CN2:ERBB2.any  1 307.15
## + TP53.MUT              1 307.30
## + Copy.number.type      4 308.42
## + CDKN2A.CN2:Stage.group 2 308.45
## - ERBB2.any             1 308.45
## + FGA.cat:Stage.group   2 308.50
## + Stage.group:ERBB2.any  2 308.76
## - FGA.cat               1 310.15
## - CDKN2A.CN2            1 311.02
## - Stage.group           3 328.81
##
## Step:  AIC=304.28
## Surv(OS.days, DSS.Status) ~ Stage.group + CDKN2A.CN2 + FGA.cat +
##   ERBB2.any + Grade
##
##                Df      AIC
## + CDKN2A.CN2:Grade      2 296.98
## + KRAS                    1 302.50
## + Grade:Stage.group     4 303.86
## <none>                    304.28
## + FGA.cat:CDKN2A.CN2   1 305.32
## - Grade                   2 305.35
## + Copy.number.type      4 305.55
## + chr9p.amp              1 305.65
## + FGA.cat:ERBB2.any     1 305.73
## + CDKN2A.CN2:ERBB2.any  1 306.02
## + TP53.MUT              1 306.05
## + FGA.cat:Grade         2 306.24
## + CDKN2A.CN2:Stage.group 2 306.78
## - ERBB2.any              1 307.05
## + Grade:ERBB2.any       2 307.22
## + Stage.group:ERBB2.any  2 307.69
## + FGA.cat:Stage.group   2 307.77
## - FGA.cat                1 309.68
## - CDKN2A.CN2            1 312.28
## - Stage.group           3 325.73
##
## Step:  AIC=296.98

```

```
## Surv(OS.days, DSS.Status) ~ Stage.group + CDKN2A.CN2 + FGA.cat +
## ERBB2.any + Grade + CDKN2A.CN2:Grade
```

```
##
##           Df      AIC
## <none>           296.98
## + Grade:Stage.group      4 297.07
## + FGA.cat:Grade          1 297.88
## + KRAS                    1 298.18
## + FGA.cat:ERBB2.any      1 298.51
## + TP53.MUT                1 298.53
## + chr9p.amp               1 298.63
## + CDKN2A.CN2:ERBB2.any   1 298.87
## + FGA.cat:CDKN2A.CN2     1 298.96
## + Stage.group:ERBB2.any  2 300.10
## + Grade:ERBB2.any        2 300.41
## + FGA.cat:Stage.group    2 300.52
## + CDKN2A.CN2:Stage.group 2 300.82
## - ERBB2.any              1 302.29
## + Copy.number.type       4 302.36
## - FGA.cat                 1 302.97
## - CDKN2A.CN2:Grade       2 304.28
## - Stage.group            3 320.93
```

**summary (phm\_f)**

```
coxph(formula = Surv(OS.days, DSS.Status) ~ Stage.group + CDKN2A.CN2 +
## coxph(formula = Surv(OS.days, DSS.Status) ~ Stage.group + CDKN2A.CN2 +
## FGA.cat + ERBB2.any + Grade + CDKN2A.CN2:Grade, na.action =
na.exclude)
```

```
##
## n= 159, number of events= 37
```

```
##           coef exp(coef) se(coef) z Pr(>|z|)
## Stage.group2 -6.169e-01 5.396e-01 8.304e-01 -0.743 0.4576
## Stage.group3 2.250e+00 9.486e+00 4.000e-01 5.625 1.85e-08
## Stage.group4 5.062e-01 1.659e+00 8.355e-01 0.606 0.5446
## CDKN2A.CN2Yes 2.235e-01 1.250e+00 5.906e-01 0.378 0.7051
## FGA.cat>10% 1.491e+00 4.441e+00 5.861e-01 2.543 0.0110
## ERBB2.anyNot amplified 1.147e+00 3.149e+00 4.679e-01 2.451 0.0142
## Grade2 -1.747e+00 1.742e-01 1.118e+00 -1.562 0.1182
## Grade3 -1.896e+01 5.819e-09 5.717e+03 -0.003 0.9974
## CDKN2A.CN2Yes:Grade2 1.411e+00 4.099e+00 1.201e+00 1.174 0.2402
## CDKN2A.CN2Yes:Grade3 2.018e+01 5.809e+08 5.717e+03 0.004 0.9972
```

```
##
## Stage.group2
## Stage.group3 ***
## Stage.group4
## CDKN2A.CN2Yes
## FGA.cat>10% *
## ERBB2.anyNot amplified *
## Grade2
## Grade3
## CDKN2A.CN2Yes:Grade2
## CDKN2A.CN2Yes:Grade3
```

```
## ---
## Signif. codes: 0 '***' 0.001 '**' 0.01 '*' 0.05 '.' 0.1 ' ' 1
```

```
##           exp(coef) exp(-coef) lower .95 upper .95
## Stage.group2 5.396e-01 1.853e+00 0.10599 2.748
## Stage.group3 9.486e+00 1.054e-01 4.33160 20.775
## Stage.group4 1.659e+00 6.028e-01 0.32261 8.531
```

```

## CDKN2A.CN2Yes          1.250e+00  7.997e-01  0.39295    3.979
## FGA.cat>10%           4.441e+00  2.252e-01  1.40781   14.008
## ERBB2.anyNot amplified 3.149e+00  3.176e-01  1.25850    7.877
## Grade2                 1.742e-01  5.739e+00  0.01946    1.560
## Grade3                 5.819e-09  1.719e+08  0.00000    Inf
## CDKN2A.CN2Yes:Grade2  4.099e+00  2.439e-01  0.38925   43.174
## CDKN2A.CN2Yes:Grade3  5.809e+08  1.722e-09  0.00000    Inf
##
## Concordance= 0.84 (se = 0.05 )
## Rsquare= 0.341 (max possible= 0.885 )
## Likelihood ratio test= 66.41 on 10 df, p=2.18e-10
## Wald test = 59.79 on 10 df, p=3.969e-09
## Score (logrank) test = 91.94 on 10 df, p=2.22e-15

```

#### 4. Akaike information criterion (AIC) multivariate modelling within MOC for progression-free survival

```

Scope=list(upper=~(chr9p.amp+Copy.number.type+FGA.cat+CDKN2A.CN2+Grade+Stage.group+ERBB2.any+KRAS+TP53.MUT)^2,lower~1)
phm_0 = coxph(Surv(PFS.days,PFS.Status)~1,na.action=na.exclude)
phm_f = stepAIC(phm_0,Scope,direction="both")

```

```

## Start: AIC=334.04
## Surv(PFS.days, PFS.Status) ~ 1
##
##           Df      AIC
## + Stage.group    3 317.21
## + Grade          2 322.66
## + FGA.cat        1 325.64
## + Copy.number.type  4 329.09
## + CDKN2A.CN2     1 329.12
## + chr9p.amp      1 332.17
## + KRAS           1 333.01
## <none>           334.04
## + TP53.MUT      1 334.48
## + ERBB2.any     1 334.68
##
## Step: AIC=317.21
## Surv(PFS.days, PFS.Status) ~ Stage.group
##
##           Df      AIC
## + CDKN2A.CN2     1 310.71
## + FGA.cat        1 311.71
## + Copy.number.type  4 313.32
## + Grade          2 315.08
## + TP53.MUT      1 315.56
## + KRAS           1 315.79
## + chr9p.amp      1 316.71
## <none>           317.21
## + ERBB2.any     1 318.80
## - Stage.group    3 334.04
##
## Step: AIC=310.71
## Surv(PFS.days, PFS.Status) ~ Stage.group + CDKN2A.CN2
##
##           Df      AIC
## + Grade          2 305.93
## + FGA.cat        1 307.96
## <none>           310.71
## + KRAS           1 310.79

```

```

## + ERBB2.any          1 311.34
## + TP53.MUT           1 311.56
## + Copy.number.type   4 311.80
## + chr9p.amp         1 312.13
## + CDKN2A.CN2:Stage.group 2 313.46
## - CDKN2A.CN2        1 317.21
## - Stage.group       3 329.12
##
## Step: AIC=305.93
## Surv(PFS.days, PFS.Status) ~ Stage.group + CDKN2A.CN2 + Grade
##
##                Df      AIC
## + CDKN2A.CN2:Grade  2 300.45
## + FGA.cat          1 302.39
## + Copy.number.type  4 305.10
## + TP53.MUT         1 305.32
## + KRAS             1 305.48
## <none>              305.93
## + ERBB2.any       1 306.73
## + Grade:Stage.group  4 307.06
## + chr9p.amp       1 307.40
## + CDKN2A.CN2:Stage.group 2 308.58
## - Grade           2 310.71
## - CDKN2A.CN2     1 315.08
## - Stage.group     3 317.67
##
## Step: AIC=300.45
## Surv(PFS.days, PFS.Status) ~ Stage.group + CDKN2A.CN2 + Grade +
##      CDKN2A.CN2:Grade
##
##                Df      AIC
## + FGA.cat          1 296.93
## <none>              300.45
## + TP53.MUT         1 300.58
## + ERBB2.any       1 300.87
## + KRAS             1 301.02
## + Grade:Stage.group  4 301.95
## + chr9p.amp       1 302.08
## + Copy.number.type  4 302.57
## + CDKN2A.CN2:Stage.group 2 304.06
## - CDKN2A.CN2:Grade  2 305.93
## - Stage.group     3 315.32
##
## Step: AIC=296.93
## Surv(PFS.days, PFS.Status) ~ Stage.group + CDKN2A.CN2 + Grade +
##      FGA.cat + CDKN2A.CN2:Grade
##
##                Df      AIC
## + ERBB2.any       1 296.88
## <none>              296.93
## + KRAS             1 297.31
## + Grade:Stage.group  4 297.44
## + chr9p.amp       1 298.43
## + TP53.MUT         1 298.67
## + Copy.number.type  4 298.72
## + FGA.cat:CDKN2A.CN2  1 298.78
## + FGA.cat:Stage.group  2 299.34
## + FGA.cat:Grade     2 299.76
## - FGA.cat          1 300.45
## + CDKN2A.CN2:Stage.group 2 300.69
## - CDKN2A.CN2:Grade  2 302.39

```

```

## - Stage.group          3 311.27
##
## Step:  AIC=296.88
## Surv(PFS.days, PFS.Status) ~ Stage.group + CDKN2A.CN2 + Grade +
##      FGA.cat + ERBB2.any + CDKN2A.CN2:Grade
##
##              Df      AIC
## + FGA.cat:ERBB2.any      1 294.77
## <none>                    296.88
## - ERBB2.any              1 296.93
## + Grade:Stage.group      4 297.61
## + CDKN2A.CN2:ERBB2.any   1 297.69
## + TP53.MUT                1 298.00
## + KRAS                    1 298.06
## + Copy.number.type       4 298.34
## + chr9p.amp              1 298.46
## + FGA.cat:CDKN2A.CN2     1 298.60
## + FGA.cat:Stage.group    2 299.41
## + FGA.cat:Grade          2 299.62
## + Grade:ERBB2.any        2 300.27
## + Stage.group:ERBB2.any  2 300.37
## + CDKN2A.CN2:Stage.group 2 300.65
## - FGA.cat                 1 300.87
## - CDKN2A.CN2:Grade       2 302.58
## - Stage.group            3 310.27
##
## Step:  AIC=294.77
## Surv(PFS.days, PFS.Status) ~ Stage.group + CDKN2A.CN2 + Grade +
##      FGA.cat + ERBB2.any + CDKN2A.CN2:Grade + FGA.cat:ERBB2.any
##
##              Df      AIC
## + FGA.cat:Stage.group    2 293.35
## + Grade:Stage.group      4 293.58
## <none>                    294.77
## + KRAS                   1 296.03
## + chr9p.amp              1 296.21
## + TP53.MUT                1 296.24
## + FGA.cat:CDKN2A.CN2     1 296.44
## + CDKN2A.CN2:ERBB2.any   1 296.75
## - FGA.cat:ERBB2.any      1 296.88
## + FGA.cat:Grade          2 297.58
## + Copy.number.type       4 298.06
## + CDKN2A.CN2:Stage.group 2 298.53
## + Stage.group:ERBB2.any  2 298.59
## + Grade:ERBB2.any        2 298.72
## - CDKN2A.CN2:Grade       2 300.07
## - Stage.group            3 308.79
##
## Step:  AIC=293.35
## Surv(PFS.days, PFS.Status) ~ Stage.group + CDKN2A.CN2 + Grade +
##       FGA.cat + ERBB2.any + CDKN2A.CN2:Grade + FGA.cat:ERBB2.any +
##       Stage.group:FGA.cat
##
##              Df      AIC
## <none>                    293.35
## + FGA.cat:Grade          1 294.71
## - Stage.group:FGA.cat    2 294.77
## + KRAS                   1 294.80
## + FGA.cat:CDKN2A.CN2     1 295.16
## + TP53.MUT                1 295.20
## + chr9p.amp              1 295.21

```

```

## + Grade:Stage.group      4 295.33
## + CDKN2A.CN2:ERBB2.any   1 295.34
## + CDKN2A.CN2:Stage.group 2 297.12
## + Copy.number.type       4 297.17
## + Stage.group:ERBB2.any  2 297.24
## + Grade:ERBB2.any        2 297.29
## - FGA.cat:ERBB2.any      1 299.41
## - CDKN2A.CN2:Grade       2 299.58

```

**summary (phm\_f)**

```

## Call:
## coxph(formula = Surv(PFS.days, PFS.Status) ~ Stage.group + CDKN2A.CN2 +
##   Grade + FGA.cat + ERBB2.any + CDKN2A.CN2:Grade + FGA.cat:ERBB2.any +
##   Stage.group:FGA.cat, na.action = na.exclude)
##
## n= 143, number of events= 36
## (16 observations deleted due to missingness)
##
##
##              coef  exp(coef)  se(coef)
z
## Stage.group2      7.374e-01  2.090e+00  4.212e+04
0.000
## Stage.group3      2.070e+01  9.776e+08  4.885e+03
0.004
## Stage.group4      4.462e-01  1.562e+00  8.182e-01
0.545
## CDKN2A.CN2Yes      1.741e-01  1.190e+00  6.248e-01
0.279
## Grade2             -1.673e+00  1.876e-01  1.151e+00 -
1.454
## Grade3             -1.991e+01  2.251e-09  1.001e+04 -
0.002
## FGA.cat>10%       -4.541e-01  6.350e-01  8.886e-01 -
0.511
## ERBB2.anyNot amplified -1.880e+01  6.850e-09  4.885e+03 -
0.004
## CDKN2A.CN2Yes:Grade2  1.214e+00  3.367e+00  1.224e+00
0.992
## CDKN2A.CN2Yes:Grade3  2.118e+01  1.577e+09  1.001e+04
0.002
## FGA.cat>10%:ERBB2.anyNot amplified 1.976e+01  3.805e+08  4.885e+03
0.004
## Stage.group2:FGA.cat>10% -8.106e-01  4.446e-01  4.212e+04
0.000
## Stage.group3:FGA.cat>10% -1.891e+01  6.129e-09  4.885e+03 -
0.004
## Stage.group4:FGA.cat>10%          NA          NA  0.000e+00
NA
##
##              Pr(>|z|)
## Stage.group2      1.000
## Stage.group3      0.997
## Stage.group4      0.585
## CDKN2A.CN2Yes      0.781
## Grade2             0.146
## Grade3             0.998
## FGA.cat>10%       0.609
## ERBB2.anyNot amplified 0.997
## CDKN2A.CN2Yes:Grade2  0.321
## CDKN2A.CN2Yes:Grade3  0.998
## FGA.cat>10%:ERBB2.anyNot amplified 0.997
## Stage.group2:FGA.cat>10% 1.000

```

```

## Stage.group3:FGA.cat>10%          0.997
## Stage.group4:FGA.cat>10%          NA
##
##                               exp(coef) exp(-coef) lower .95
## Stage.group2                   2.090e+00  4.784e-01  0.00000
## Stage.group3                   9.776e+08  1.023e-09  0.00000
## Stage.group4                   1.562e+00  6.400e-01  0.31433
## CDKN2A.CN2Yes                  1.190e+00  8.402e-01  0.34973
## Grade2                         1.876e-01  5.331e+00  0.01967
## Grade3                         2.251e-09  4.443e+08  0.00000
## FGA.cat>10%                   6.350e-01  1.575e+00  0.11129
## ERBB2.anyNot amplified         6.850e-09  1.460e+08  0.00000
## CDKN2A.CN2Yes:Grade2          3.367e+00  2.970e-01  0.30598
## CDKN2A.CN2Yes:Grade3          1.577e+09  6.343e-10  0.00000
## FGA.cat>10%:ERBB2.anyNot amplified 3.805e+08  2.628e-09  0.00000
## Stage.group2:FGA.cat>10%      4.446e-01  2.249e+00  0.00000
## Stage.group3:FGA.cat>10%      6.129e-09  1.632e+08  0.00000
## Stage.group4:FGA.cat>10%      NA          NA          NA
##                               upper .95
## Stage.group2                   Inf
## Stage.group3                   Inf
## Stage.group4                   7.766
## CDKN2A.CN2Yes                  4.050
## Grade2                         1.789
## Grade3                         Inf
## FGA.cat>10%                   3.623
## ERBB2.anyNot amplified         Inf
## CDKN2A.CN2Yes:Grade2          37.060
## CDKN2A.CN2Yes:Grade3          Inf
## FGA.cat>10%:ERBB2.anyNot amplified Inf
## Stage.group2:FGA.cat>10%      Inf
## Stage.group3:FGA.cat>10%      Inf
## Stage.group4:FGA.cat>10%      NA
##
## Concordance= 0.839 (se = 0.05 )
## Rsquare= 0.373 (max possible= 0.903 )
## Likelihood ratio test= 66.69 on 13 df, p=3.241e-09
## Wald test = 42.53 on 13 df, p=5.369e-05
## Score (logrank) test = 88.13 on 13 df, p=3.187e-13

```



**b. Correlation of genetic events with grade and classification – source data in Supplementary Data 1**

**Supplementary Table 5 Correlation with Classification**

|                                                 |                     | <b>BEN</b>  | <b>MBT</b>  | <b>MOC</b>  | <b>EOM</b> | <b>p value (FET*)</b>        |
|-------------------------------------------------|---------------------|-------------|-------------|-------------|------------|------------------------------|
| <b>KRAS</b>                                     | MUT                 | 12 (54.5%)  | 28 (71.8%)  | 124 (63.6%) | 11 (40.7%) | 0.063                        |
|                                                 | WT                  | 10 (45.5%)  | 11 (28.2%)  | 71 (36.4%)  | 16 (59.3%) |                              |
| <b>BRAF</b>                                     | MUT                 | 0 (0.0%)    | 4 (10.3%)   | 18 (9.4%)   | 2 (7.7%)   | 0.563                        |
|                                                 | WT                  | 22 (100.0%) | 35 (89.7%)  | 174 (90.6%) | 24 (92.3%) |                              |
| <b>TP53</b>                                     | MUT                 | 2 (9.1%)    | 7 (17.9%)   | 124 (63.6%) | 11 (40.7%) | <b>&lt;0.001</b>             |
|                                                 | WT                  | 20 (90.9%)  | 32 (82.1%)  | 71 (36.4%)  | 16 (59.3%) |                              |
| <b>CDKN2A inactivating</b>                      | Yes                 | 5 (29.4%)   | 20 (51.3%)  | 103 (52.8%) | 7 (25.9%)  | 0.016                        |
|                                                 | No                  | 12 (70.6%)  | 19 (48.7%)  | 92 (47.2%)  | 20 (74.1%) |                              |
| <b>CDKN2A any (CN or mutation)</b>              | Yes                 | 12 (54.5%)  | 25 (64.1%)  | 151 (77.4%) | 7 (25.9%)  | <b>&lt;0.001</b>             |
|                                                 | No                  | 10 (45.5%)  | 14 (35.9%)  | 44 (22.6%)  | 20 (74.1%) |                              |
| <b>CDKN2A Loss/LOH</b>                          | Loss                | 12 (54.5%)  | 22 (56.4%)  | 136 (69.7%) | 5 (18.5%)  | <b>&lt;0.001</b>             |
|                                                 | No Loss             | 10 (45.5%)  | 17 (43.6%)  | 59 (30.3%)  | 22 (81.5%) |                              |
| <b>ERBB2</b>                                    | Amplified           | 0 (0.0%)    | 4 (3.7%)    | 52 (26.0%)  | 2 (6.5%)   | <b>&lt;0.001</b>             |
|                                                 | Not amplified       | 22 (100.0%) | 104 (96.3%) | 148 (74.0%) | 29 (93.5%) |                              |
| <b>Copy number type</b>                         | Complex             | 0 (0.0%)    | 5 (12.8%)   | 45 (23.1%)  | 7 (25.9%)  | <b>&lt;0.001<sup>^</sup></b> |
|                                                 | Complex (whole chr) | 0 (0.0%)    | 1 (2.6%)    | 10 (5.1%)   | 1 (3.7%)   |                              |
|                                                 | Complex + amps      | 1 (4.5%)    | 0 (0.0%)    | 78 (40.0%)  | 9 (33.3%)  |                              |
|                                                 | Simple              | 20 (90.9%)  | 32 (82.1%)  | 44 (22.6%)  | 8 (29.6%)  |                              |
|                                                 | Simple + amp        | 1 (4.5%)    | 1 (2.6%)    | 18 (9.2%)   | 2 (7.4%)   |                              |
| <b>Number of chromosomes with amplification</b> | Multiple            | 1 (4.5%)    | 2 (5.1%)    | 70 (35.9%)  | 9 (33.3%)  | <b>&lt;0.001<sup>^</sup></b> |
|                                                 | None                | 20 (90.9%)  | 32 (82.1%)  | 74 (37.9%)  | 12 (44.4%) |                              |
|                                                 | Single              | 1 (4.5%)    | 5 (12.8%)   | 51 (26.2%)  | 6 (22.2%)  |                              |

\*Fisher's exact test performed with Monte Carlo estimation

<sup>^</sup>Chi-squared test performed

Includes 8 MOC, 2 EOM, 12 MBT and 17 BEN screened by Sanger sequencing only for KRAS, BRAF and TP53, and with copy number data from SNP arrays.

**Supplementary Table 6 Correlation with grade**

|                                                 |                     | BEN         | MBT         | 1          | 2          | 3          | EOM        | p value (FET*)               |
|-------------------------------------------------|---------------------|-------------|-------------|------------|------------|------------|------------|------------------------------|
| <b>KRAS</b>                                     | MUT                 | 12 (54.5%)  | 28 (71.8%)  | 60 (69.0%) | 51 (64.6%) | 12 (50.0%) | 11 (40.7%) | 0.066                        |
|                                                 | WT                  | 10 (45.5%)  | 11 (28.2%)  | 27 (31.0%) | 28 (35.4%) | 12 (50.0%) | 16 (59.3%) |                              |
| <b>BRAF</b>                                     | MUT                 | 0 (0.0%)    | 4 (10.3%)   | 7 (8.2%)   | 9 (11.5%)  | 1 (4.2%)   | 2 (7.7%)   | 0.66                         |
|                                                 | WT                  | 22 (100.0%) | 35 (89.7%)  | 78 (91.8%) | 69 (88.5%) | 23 (95.8%) | 24 (92.3%) |                              |
| <b>TP53</b>                                     | MUT                 | 2 (9.1%)    | 7 (17.9%)   | 54 (62.1%) | 49 (62.0%) | 18 (75.0%) | 11 (40.7%) | <b>&lt;0.001</b>             |
|                                                 | WT                  | 20 (90.9%)  | 32 (82.1%)  | 33 (37.9%) | 30 (38.0%) | 6 (25.0%)  | 16 (59.3%) |                              |
| <b>CDKN2A inactivating</b>                      | Yes                 | 5 (29.4%)   | 20 (51.3%)  | 47 (54.0%) | 40 (50.6%) | 14 (58.3%) | 7 (25.9%)  | 0.061                        |
|                                                 | No                  | 12 (70.6%)  | 19 (48.7%)  | 40 (46.0%) | 39 (49.4%) | 10 (41.7%) | 20 (74.1%) |                              |
| <b>CDKN2A any (CN or mutation)</b>              | Yes                 | 12 (54.5%)  | 25 (64.1%)  | 70 (80.5%) | 60 (75.9%) | 18 (75.0%) | 7 (25.9%)  | <b>&lt;0.001</b>             |
|                                                 | No                  | 10 (45.5%)  | 14 (35.9%)  | 17 (19.5%) | 19 (24.1%) | 6 (25.0%)  | 20 (74.1%) |                              |
| <b>CDKN2A Loss/LOH</b>                          | Loss                | 12 (54.5%)  | 22 (56.4%)  | 62 (71.3%) | 55 (69.6%) | 16 (66.7%) | 5 (18.5%)  | <b>&lt;0.001</b>             |
|                                                 | No Loss             | 10 (45.5%)  | 17 (43.6%)  | 25 (28.7%) | 24 (30.4%) | 8 (33.3%)  | 22 (81.5%) |                              |
| <b>ERBB2</b>                                    | Amplified           | 0 (0.0%)    | 4 (3.7%)    | 24 (27.6%) | 18 (22.0%) | 8 (32.0%)  | 2 (6.5%)   | <b>&lt;0.001</b>             |
|                                                 | Not amplified       | 22 (100.0%) | 104 (96.3%) | 63 (72.4%) | 64 (78.0%) | 17 (68.0%) | 29 (93.5%) |                              |
| <b>Copy number type</b>                         | Complex             | 0 (0.0%)    | 5 (12.8%)   | 19 (21.8%) | 17 (21.5%) | 7 (29.2%)  | 7 (25.9%)  | <b>&lt;0.001<sup>^</sup></b> |
|                                                 | Complex (whole chr) | 0 (0.0%)    | 1 (2.6%)    | 3 (3.4%)   | 5 (6.3%)   | 2 (8.3%)   | 1 (3.7%)   |                              |
|                                                 | Complex + amps      | 1 (4.5%)    | 0 (0.0%)    | 25 (28.7%) | 39 (49.4%) | 13 (54.2%) | 9 (33.3%)  |                              |
|                                                 | Simple              | 20 (90.9%)  | 32 (82.1%)  | 29 (33.3%) | 12 (15.2%) | 1 (4.2%)   | 8 (29.6%)  |                              |
|                                                 | Simple + amp        | 1 (4.5%)    | 1 (2.6%)    | 11 (12.6%) | 6 (7.6%)   | 1 (4.2%)   | 2 (7.4%)   |                              |
| <b>Number of chromosomes with amplification</b> | Multiple            | 1 (4.5%)    | 2 (5.1%)    | 22 (25.3%) | 34 (43.0%) | 13 (54.2%) | 9 (33.3%)  | <b>&lt;0.001<sup>^</sup></b> |
|                                                 | None                | 20 (90.9%)  | 32 (82.1%)  | 41 (47.1%) | 24 (30.4%) | 7 (29.2%)  | 12 (44.4%) |                              |
|                                                 | Single              | 1 (4.5%)    | 5 (12.8%)   | 24 (27.6%) | 21 (26.6%) | 4 (16.7%)  | 6 (22.2%)  |                              |

\*Fisher's exact test performed with Monte Carlo estimation

<sup>^</sup>Chi-squared test performed

Includes 8 MOC, 2 EOM, 12 MBT and 17 BEN screened by Sanger sequencing only for *KRAS*, *BRAF* and *TP53*, and with copy number data from SNP arrays.

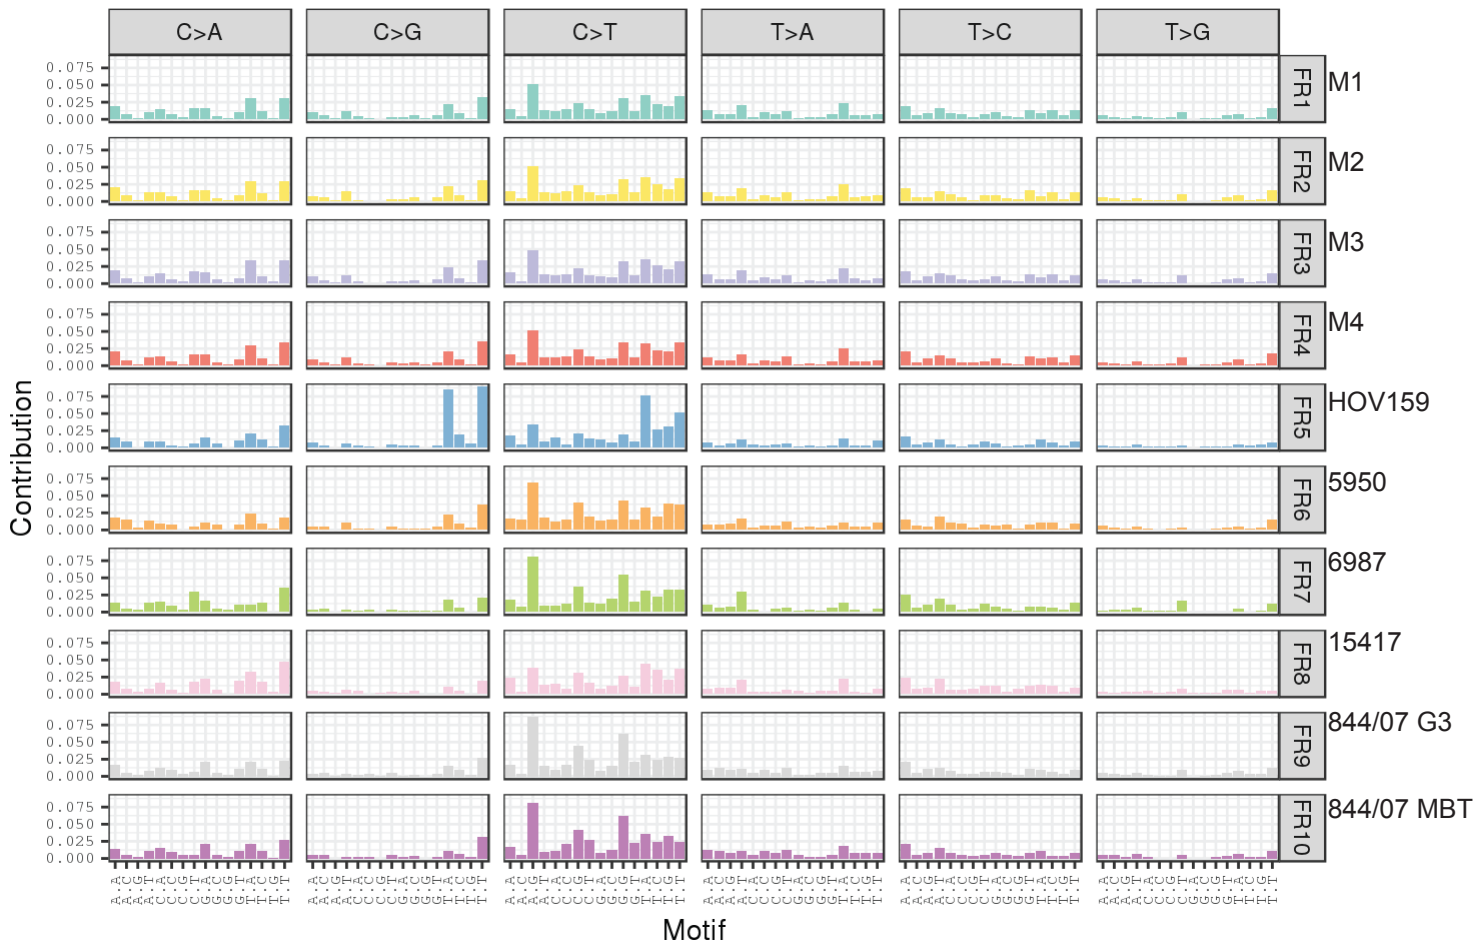

### Somatic Signatures: NMF - Barchart

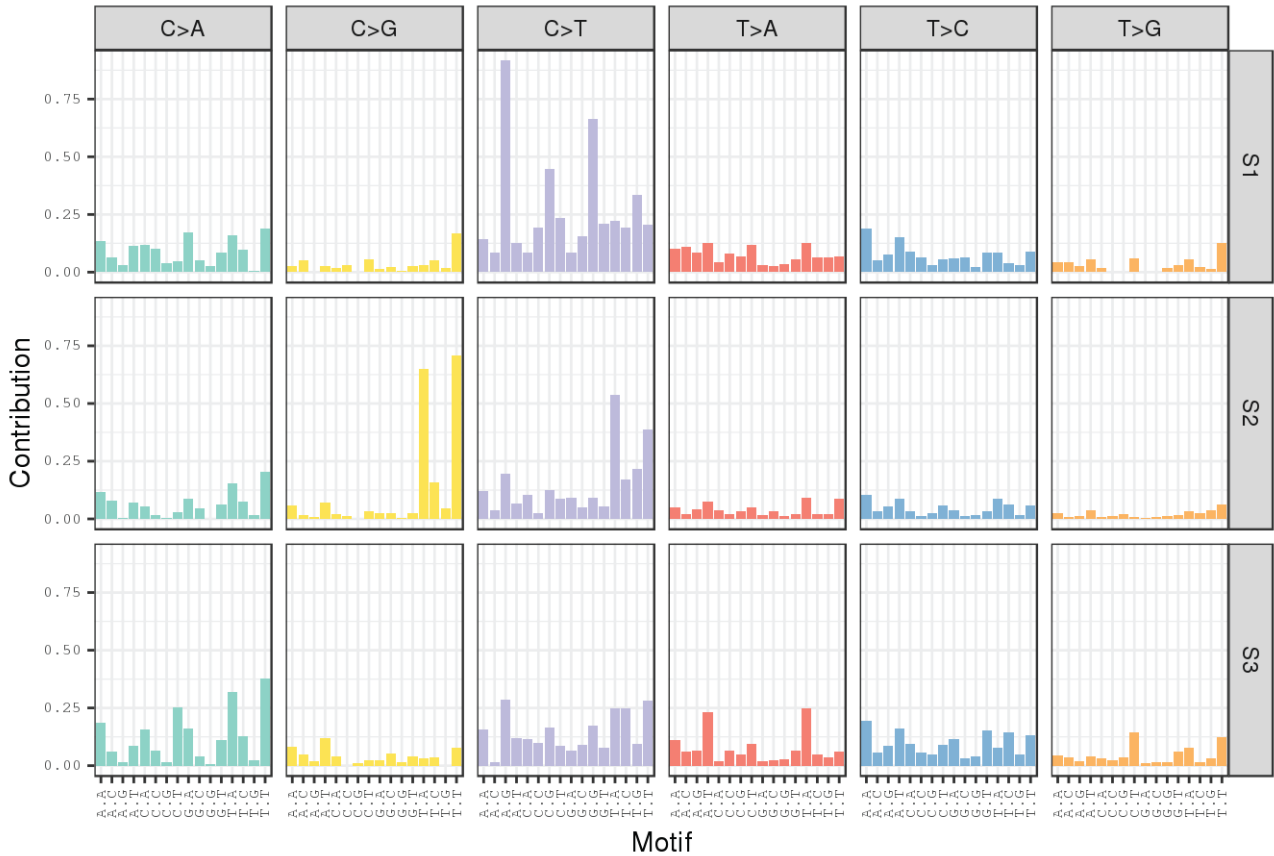

**Supplementary Figure 6. De novo mutation signature detection of whole genome sequencing samples.**  
 Top: Variant trinucleotide profiles of cases. M1 - M4, 4 metastatic sites from rapid autopsy case. Bottom: Signatures predicted.

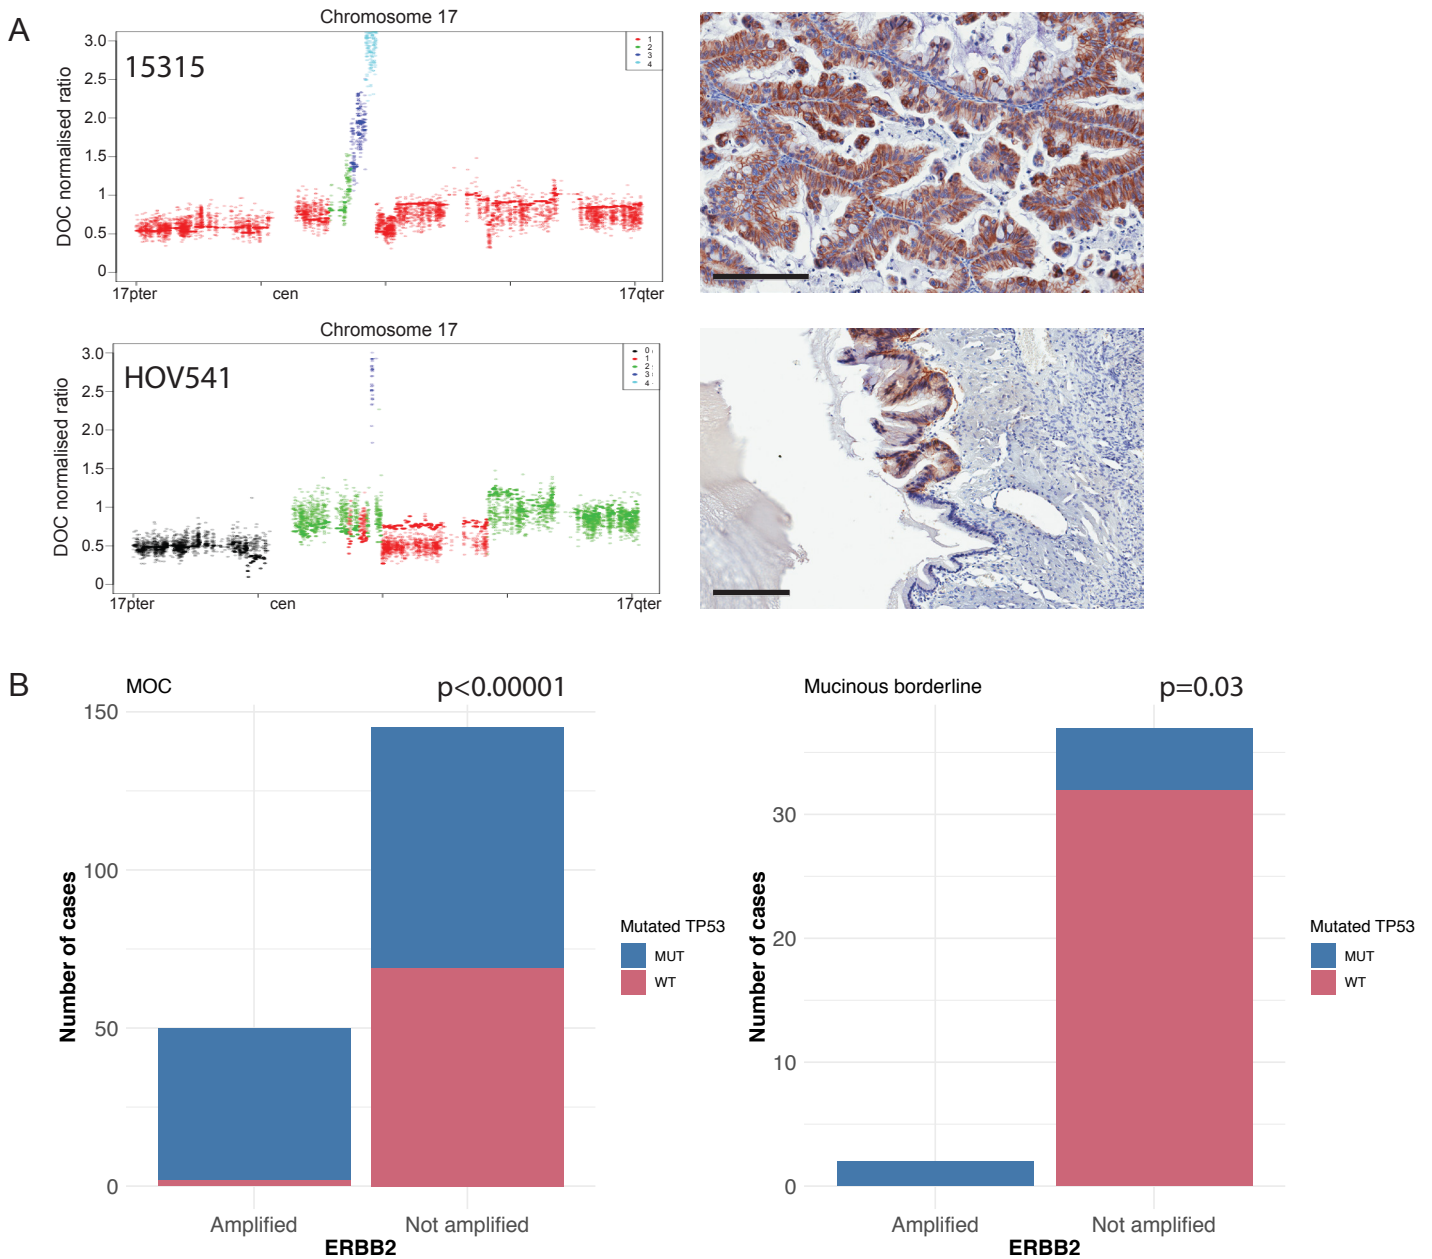

**Supplementary Figure 7. ERBB2 amplification**

**A.** Concordance of IHC (images at right) with copy number by array/sequencing (chromosome 17 profiles at left). 15315 - case with perfect concordance of 3+ staining and high level amplification. HOV541 - case with concordance of 3+ staining and high level amplification, but showing negative staining in nearby area of non-malignant epithelium. Scale bars 200  $\mu$ m.

**B.** Correlation of *ERBB2* amplification (IHC/CISH or copy number) with mutated *TP53*. *ERBB2* amplified MOC are strongly associated with mutant *TP53*, whereas this is a rarer combination in mucinous borderline tumours. P values from two-sided Fisher's exact test: MOC OR 21.54, 95% CI 5.3-189.3; MBL OR Inf, 95% CI 0.93-Inf. Difference in the combination of *TP53* mutated/*ERBB2* amplified versus not, comparing MOC with borderline,  $O=0.0049$ , two-sided Fisher's exact test, OR 0.17, 95%CI 0.02-0.69.

A

| Ensembl.ID      | Chromosome | Gene.start.bp | Gene.end.bp | Gene.name | Amplicon | No_Amplicon | FDR     | AveExpr | P value  |
|-----------------|------------|---------------|-------------|-----------|----------|-------------|---------|---------|----------|
| ENSG00000107341 | 9          | 33817567      | 33920404    | UBE2R2    | 0        | -1.36813    | 0.00002 | 6.10965 | 1.53E-09 |
| ENSG00000137073 | 9          | 33921693      | 34048949    | UBAP2     | 0        | -1.65231    | 0.00004 | 6.31700 | 4.93E-09 |
| ENSG00000198876 | 9          | 34086387      | 34127399    | DCAF12    | 0        | -1.44861    | 0.00004 | 6.08446 | 8.10E-09 |
| ENSG00000164978 | 9          | 34329506      | 34343713    | NUDT2     | 0        | -1.93047    | 0.00025 | 3.62134 | 6.78E-08 |
| ENSG00000137100 | 9          | 34613545      | 34620523    | DCTN3     | 0        | -1.10607    | 0.00026 | 4.03182 | 8.79E-08 |
| ENSG00000186638 | 9          | 34252381      | 34311371    | KIF24     | 0        | -2.38225    | 0.00041 | 3.09456 | 1.65E-07 |
| ENSG00000164967 | 9          | 34610486      | 34612104    | RPP25L    | 0        | -1.58068    | 0.00199 | 3.38779 | 9.38E-07 |
| ENSG00000147955 | 9          | 34634722      | 34637809    | SIGMAR1   | 0        | -1.45988    | 0.01645 | 4.80132 | 9.63E-06 |
| ENSG00000186871 | X          | 72204657      | 72239047    | ERCC6L    | 0        | -2.29417    | 0.01645 | 2.25817 | 9.98E-06 |
| ENSG00000165006 | 9          | 34179005      | 34252523    | UBAP1     | 0        | -1.00380    | 0.02245 | 5.76266 | 1.51E-05 |
| ENSG00000123975 | 9          | 89311198      | 89316703    | CKS2      | 0        | -2.02474    | 0.02583 | 3.79337 | 1.92E-05 |
| ENSG00000178691 | 17         | 31937018      | 32001045    | SUZ12     | 0        | -1.25460    | 0.03973 | 6.14738 | 3.58E-05 |
| ENSG00000164109 | 4          | 120055608     | 120067074   | MAD2L1    | 0        | -1.93745    | 0.03973 | 3.65113 | 3.60E-05 |
| ENSG00000123219 | 5          | 65517766      | 65563171    | CENPK     | 0        | -1.91351    | 0.03973 | 3.30296 | 3.83E-05 |
| ENSG00000111247 | 12         | 4538798       | 4560048     | RAD51AP1  | 0        | -1.94434    | 0.03973 | 3.04424 | 4.13E-05 |
| ENSG00000108651 | 17         | 31860899      | 31901765    | UTP6      | 0        | -0.99733    | 0.03973 | 5.68644 | 4.29E-05 |
| ENSG00000126858 | 17         | 32142454      | 32253374    | RHOT1     | 0        | -0.99427    | 0.04623 | 5.78200 | 5.30E-05 |
| ENSG00000176208 | 17         | 30831970      | 30895869    | ATAD5     | 0        | -1.89710    | 0.04739 | 4.32448 | 5.83E-05 |
| ENSG00000198056 | 12         | 56731596      | 56752373    | PRIM1     | 0        | -1.34491    | 0.04739 | 3.34625 | 6.37E-05 |
| ENSG00000134291 | 12         | 47963569      | 47968878    | TMEM106C  | 0        | -1.80443    | 0.04739 | 6.02772 | 6.39E-05 |
| ENSG00000185480 | 12         | 102120185     | 102197520   | PARPBP    | 0        | -1.71474    | 0.04882 | 3.51519 | 6.91E-05 |

B

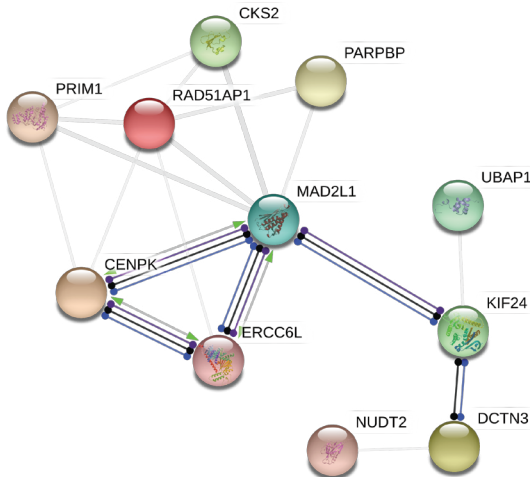

D

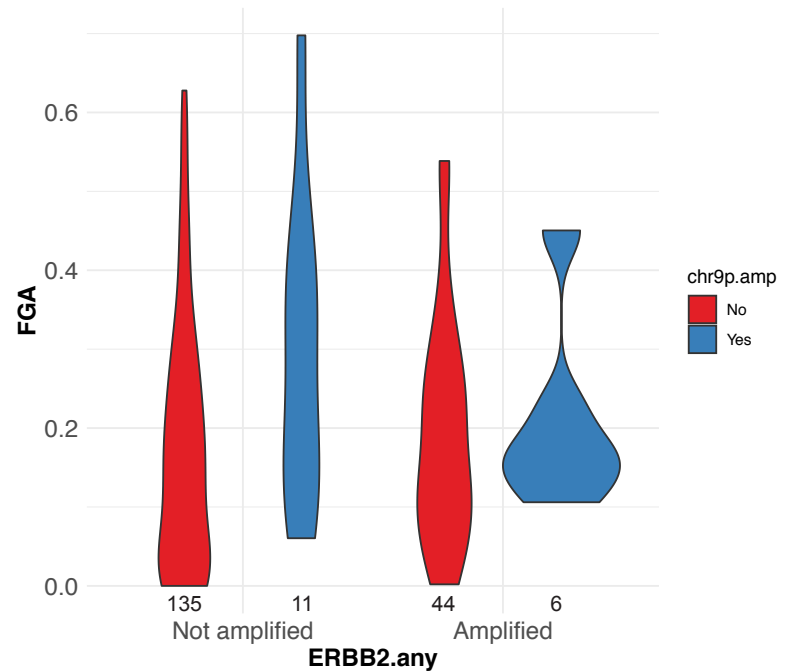

C

| #pathway ID | pathway description                      | observed gene count | false discovery rate | matching proteins in your network (labels)   |
|-------------|------------------------------------------|---------------------|----------------------|----------------------------------------------|
| GO.0000777  | condensed chromosome kinetochore         | 4                   | 0.0015               | CENPK,DCTN3,ERCC6L,MAD2L1                    |
| GO.0000779  | condensed chromosome, centromeric region | 4                   | 0.0015               | CENPK,DCTN3,ERCC6L,MAD2L1                    |
| GO.0005694  | chromosome                               | 7                   | 0.0015               | CENPK,DCTN3,ERCC6L,MAD2L1,PARPBP,PRIM1,SUZ12 |
| GO.0044427  | chromosomal part                         | 7                   | 0.0015               | CENPK,DCTN3,ERCC6L,MAD2L1,PARPBP,PRIM1,SUZ12 |
| GO.0000793  | condensed chromosome                     | 4                   | 0.00618              | CENPK,DCTN3,ERCC6L,MAD2L1                    |

### Supplementary Figure 8. 9p Amplicon RNAseq analysis

A: Gene differentially expressed by Degust between 9p amplicon containing and absent cases.

B: STRING network (unconnected nodes not shown).

C: GO terms enriched in network (determined by STRING).

D: Comparison of fraction genome altered by copy number (FGA) by amplification status. The presence of the 9p amplicon is associated with a statistically significant increase in FGA (ANOVA + Tukey post test  $p=0.037$  F value = 4.435, diff 0.08, 95% CI 0.005-0.16), which was not the case for *ERBB2* amplification ( $p=0.66$  F value = 0.19, diff -0.01, 95% CI 0.06-0.039). Number of MOC in each group indicated below. A model that included grade still showed a significant association for 9p amplification and FGA (ANOVA + Tukey post test,  $p=0.02$ , diff 0.087, 95% CI 0.014-0.16).

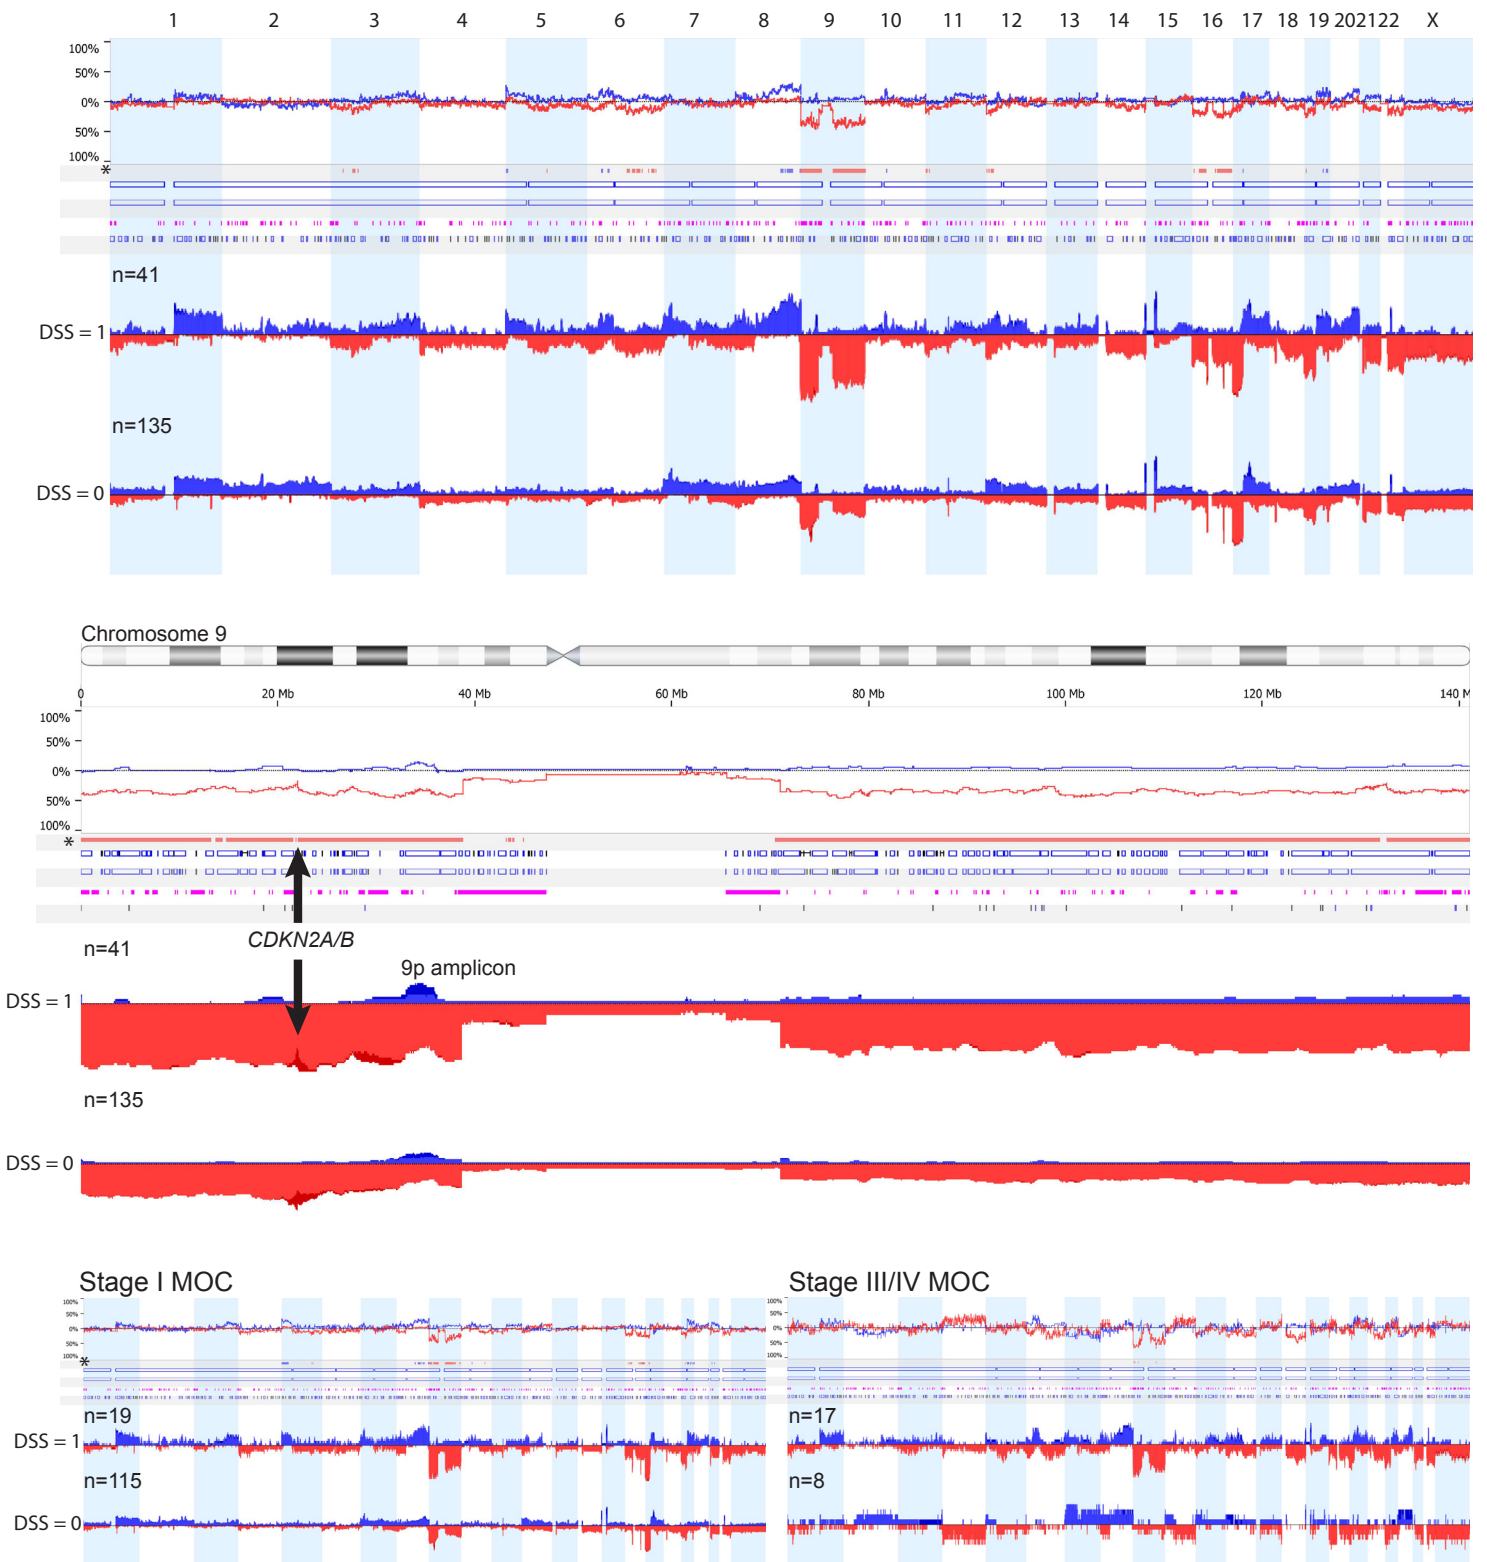

**Supplementary Figure 9. Differences in copy number based on disease specific survival status (DSS, 1 = deceased, 0 = alive). Gains in blue, losses in red. In each panel, the difference plot is above and the individual frequency plots for each group below. \*Red bars indicate significantly different losses and blue bars indicate significantly different gains at  $p < 0.05$ . Top - all MOC genome-wide. Middle - all MOC, chromosome 9 only. Bottom, MOC subdivided by stage, genome-wide.**

### **c. Mutational signatures in MOC**

Mutation signatures were only derived for paired exome samples (n=41). As stated in the main results, COSMIC signature 1 was the most common dominant signature in MOC. For many cases (18/41) there was no single signature assigned that encompassed >40% of variants. Mismatch repair (MMR)-related signatures (Sigs 6, 15 and 26) were frequently observed (71% of MOC, 21/41) most often as minor components (10-40% of variants). We do not think the presence of these signatures indicates a true mismatch repair deficiency due to the lack of any detectable germline or somatic MMR gene mutations or hypermutation in these cases. Their presence is perhaps indicative of a similarity in mutational processes to colorectal, gastric or endometrial tumors that would have been represented in the building of this mutation signature. The exception was a single MOC in the validation cohort that carried an *MSH3* mutation and high mutation load (0.5% of MOC overall).

### **d. Structural analysis**

As described, we identified five general copy number profile types: simple ( $\leq 4$  chromosomes affected, 23% of cases), simple with one high-level amplification (9% of cases, 11/17 of which were *ERBB2* amplified), complex (23% of cases, > 4 chromosomes affected), complex-whole chromosome (5% of cases, >4 chromosomes but with few intra-chromosomal breakpoints) and complex with multiple high-level amplifications (40% of cases).

The most common amplicon, targeting *ERBB2*, was most often associated with one of the complex profiles (78% of amplified cases), similar to observations in gastric cancer but different from breast cancer (1, 2).

Measures of genomic instability were correlated with mutational data. The copy number type, number of chromosomes with high-level copy number aberrations and fraction of the genome

altered (FGA) by copy number were not positively associated with mutated *KRAS* either as categorical or numerical features in MOC. *TP53* mutation was strongly associated with these features in MOC.

**Supplementary Table 7: Association of genomic instability measures with mutation status**

| Feature                                         | <i>KRAS</i><br>mut/wt | P value            | <i>TP53</i><br>mut/wt | P value             | <i>ERBB2</i><br>amp/not | P value             |
|-------------------------------------------------|-----------------------|--------------------|-----------------------|---------------------|-------------------------|---------------------|
| Mean FGA                                        | 16%/23%               | 0.045 <sup>1</sup> | 22%/12%               | <0.001 <sup>1</sup> | 19.4%/18.3%             | 0.34 <sup>1</sup>   |
| Mean # chr with amplifications                  | 1.17/2.14             | 0.265 <sup>1</sup> | 2.08/0.55             | <0.001 <sup>1</sup> | 2.47/1.19               | <0.001 <sup>1</sup> |
| FGA.cat (<10% >10%)                             |                       | 0.46 <sup>2</sup>  |                       | <0.001 <sup>2</sup> |                         | <0.001 <sup>2</sup> |
| # chr with amplifications (None, one, multiple) |                       | 0.58 <sup>2</sup>  |                       | <0.001 <sup>2</sup> |                         | <0.001 <sup>2</sup> |
| CN type                                         |                       | 0.76 <sup>3</sup>  |                       | <0.001 <sup>3</sup> |                         | <0.001 <sup>3</sup> |

1. (Wilcoxon rank sum test) 2. Fisher's exact test 3. Chi-squared test. Source data in Supplementary Table 1.

The 9p13.3 amplicon was present in two high-grade carcinomas (HOV159 and 5950) for which we had WGS data. The mechanism of amplification differed between these cases, with the structural rearrangement data for HOV159 mostly internal to chromosome 9, comprising tandem duplication and a complex series of deletions (encompassing *CDKN2A*) and inversions (Fig 3). In contrast, 5950 had fold-back inversions and more external breakpoint partners (Fig 3).

Overall, the WGS data is summarised below. None had a profile of high numbers of small tandem duplications suggesting homologous recombination deficiency (3). Patient 5950 had a profile with many small (<1 Mb) inversions, deletions and duplications (64.5% of SV) suggesting mostly intra-chromosomal breakage-fusion-bridge cycles, whereas HOV159 and 15407 tended to have larger intra-chromosomal events (34% and 35% of structural variants), and 6987 had high levels of inter-chromosomal translocations (38.5%). The primary tumor for the rapid autopsy case (844/07) had fewer structural variations, and similar to 5950 these were most often small intra-chromosomal events, although with fewer small duplications



than 5950. The metastatic sites of this case (M1-4) were similar to each other, and had many more structural variants than the primary tumors. In particular they had an increase in foldback inversions consistent with the presence of multiple high-level amplifications.

**Supplementary Table 8: Structural variant categories based on Shah *et al.* (3)**

| Sample     | Balanced   |            |              | Unbalanced            |                 | Balanced Translocation | Total number |
|------------|------------|------------|--------------|-----------------------|-----------------|------------------------|--------------|
|            | Del <1Mb   | Dup <1Mb   | INV (30-1Mb) | (DUP, DEL, INV >1 Mb) | FB INV (<30 kb) |                        |              |
| 6987       | 17 (9.5%)  | 7 (3.9%)   | 22 (12.3%)   | 114 (63.7%)           | 18 (10.1%)      | 1 (0.6%)               | 179          |
| 5950       | 31 (29.0%) | 11 (10.3%) | 12 (11.2%)   | 38 (35.5%)            | 15 (14.0%)      | 0 (0.0%)               | 107          |
| HOV159     | 52 (26.5%) | 5 (2.6%)   | 12 (6.1%)    | 108 (55.1%)           | 14 (7.1%)       | 5 (2.6%)               | 196          |
| 15407      | 27 (17.2%) | 9 (5.7%)   | 14 (8.9%)    | 89 (56.7%)            | 16 (10.2%)      | 2 (1.3%)               | 157          |
| 844/07 MBT | 26 (38.2%) | 2 (2.9%)   | 9 (13.2%)    | 25 (36.8%)            | 6 (8.8%)        | 0 (0.0%)               | 68           |
| 844/07 G3  | 17 (28.8%) | 1 (1.7%)   | 9 (15.3%)    | 28 (47.5%)            | 4 (6.8%)        | 0 (0.0%)               | 59           |
| M1         | 38 (25.5%) | 5 (3.4%)   | 11 (7.4%)    | 73 (49.0%)            | 20 (13.4%)      | 2 (1.3%)               | 149          |
| M2         | 35 (25.7%) | 6 (4.4%)   | 11 (8.1%)    | 68 (50.0%)            | 16 (11.8%)      | 0 (0.0%)               | 136          |
| M3         | 33 (23.9%) | 4 (2.9%)   | 12 (8.7%)    | 70 (50.7%)            | 18 (13.0%)      | 1 (0.7%)               | 138          |
| M4         | 40 (27.4%) | 6 (4.1%)   | 12 (8.2%)    | 69 (47.3%)            | 17 (11.6%)      | 2 (1.4%)               | 146          |

**Supplementary Table 9: Alternative summary of structural variants**

| Sample     | Small intra-chromosomal (<1Mb) | Large intra-chromosomal (>1 Mb) | Inter-chromosomal | Total number |
|------------|--------------------------------|---------------------------------|-------------------|--------------|
| 6987       | 64 (35.8%)                     | 46 (25.7%)                      | 69 (38.5%)        | 179          |
| 5950       | 69 (64.5%)                     | 18 (16.8%)                      | 20 (18.7%)        | 107          |
| HOV159     | 83 (42.3%)                     | 67 (34.2%)                      | 46 (23.5%)        | 196          |
| 15407      | 66 (42.0%)                     | 55 (35.0%)                      | 36 (22.9%)        | 157          |
| 844/07 MBT | 43 (63.2%)                     | 8 (11.8%)                       | 17 (25.0%)        | 68           |
| 844/07 G3  | 31 (52.5%)                     | 10 (16.9%)                      | 18 (30.5%)        | 59           |
| M1         | 74 (49.7%)                     | 36 (24.2%)                      | 39 (26.2%)        | 149          |
| M2         | 68 (50.0%)                     | 35 (25.7%)                      | 33 (24.3%)        | 136          |
| M3         | 67 (48.6%)                     | 33 (23.9%)                      | 38 (27.5%)        | 138          |
| M4         | 75 (51.4%)                     | 35 (24.0%)                      | 36 (24.7%)        | 146          |

**e. Rapid autopsy case**

The patient was aged 41 years at diagnosis, and initially presented with elevated CA125 and CA19-9 and a large mass on imaging. She underwent surgery to remove the 100 mm diameter tumor, which was localized to the ovary (Stage IA) and appeared to have an intact capsule. Some of the omentum, the opposite ovary, both fallopian tubes, uterus and cervix

were also removed, with no abnormalities detected. The initial pathology report stated that most of the tumor was borderline, with small areas of intraepithelial carcinoma and invasive carcinoma, mostly expansile invasion, but small areas of infiltrative invasion were noted. Post-surgical imaging (PET/CT) did not identify any overt metastatic disease. No chemotherapy was administered.

After 21 months, her serum markers were still normal, however at 26 months after surgery, she presented with abdominal discomfort and elevated CA125 and CA19-9 (Figure 4). A CT scan indicated omental thickening, ascites and pleural effusion. Her rapidly deteriorating condition meant that no chemotherapy was given, and death followed within a month of the recurrence. She had significant co-morbidities, including obesity and Type II diabetes (diagnosed two years before the cancer); the latter was not controlled at recurrence. On autopsy, disease was widespread with peritoneal, pleural, rectus abdominis muscle and lymph node metastases. Sixteen tissue specimens were collected at autopsy (Figure 4). The pancreas was sampled without finding any abnormalities.

Pathology review of the initial tumor confirmed that this was likely an ovarian primary, further supported by immunohistochemistry, which showed CK7+, CK20+, CDX2 focally positive, PAX8 and ER negative. Histopathological analysis of the primary and recurrence tumors identified a small area in the primary tumor that had high grade characteristics, which matched the histology of the recurrence sites. All recurrence sites showed high grade, infiltrative tumors (Figure 4).

DNA and RNA was extracted from dissected frozen tissue, including separate areas of borderline and high-grade morphology in the primary tumor. Whole genome sequencing was

performed on the two primary areas and four metastatic sites: omentum (M1), right iliac lymph node (M3), diaphragm (pleural side, M2) and para-aortic lymph node (M4).

De novo mutational signature detection found that the primary tumor samples were very similar, mostly comprised of signature S1 (related to COSMIC Sig 1). However, the four samples from metastases had quite a different composite signature, with a reduced contribution from S1, and an increased contribution from S3 and to a lesser extent S2 (APOBEC, COSMIC Sigs 2 and 13). The metastatic sites were very similar to each other, as reflected in the Sanger sequencing data across all 15 available sites shown in the table below. The variation in allele frequencies observed across these samples can be explained by differing levels of normal cell contamination in each.

**Supplementary Table 10:** Sanger sequencing validation of variants in primary borderline (BDL) sample and 15 metastatic sites. Highlighted in blue are the sites that underwent WGS. Colours indicate the percentage of the allele in the sample, estimated from the electrophoretogram.

| Site:          | BDL primary | R pleura | pleural diaphragm | LN L lung | L pleura | rectus muscle | L para-aortic LN | R iliac LN | small bowel | R iliac LN (B) | R para-aortic LN | Omental | Omental | porta-hepatic LN | peritoneal surface | anterior mediastinal |
|----------------|-------------|----------|-------------------|-----------|----------|---------------|------------------|------------|-------------|----------------|------------------|---------|---------|------------------|--------------------|----------------------|
| chr11:54014453 | 0           | 0        | 1                 | 0         | 0        | 0             | 0                | 0          | 0           | 0              | DNW              | 0       | 0       | 0                | 0                  | 0                    |
| HS6ST3         | 0           | 0        | 1                 | 1         | 0        | 0             | 1                | 1          | 2           | 1              | 1                | 1       | 1       | 1                | 1                  | 1                    |
| chr1:101400874 | 0           | 0        | 1                 | 1         | 0        | 1             | 1                | 1          | 1           | 1              | 1                | 1       | 1       | 1                | 1                  | 1                    |
| chr8:114907557 | 0           | 0        | 1                 | 0         | 0        | 1             | 1                | 1          | 1           | 1              | 1                | 2       | 1       | 2                | 1                  | 1                    |
| NFIB           | 0           | 0        | 1                 | 1         | 1        | 1             | 1                | 1          | 1           | 1              | 1                | 2       | 1       | 1                | 1                  | 1                    |
| TRAF3IP3       | 0           | 0        | 0                 | 1         | 1        | 1             | 1                | 1          | 1           | 1              | 1                | 1       | 1       | 1                | 1                  | 1                    |
| RP11-473J6.1   | 0           | 1        | 1                 | 2         | 1        | 1             | 1                | 1          | 1           | 1              | 1                | 1       | 1       | 1                | 1                  | 1                    |
| RP11-401O9.3   | 0           | 1        | 2                 | 2         | 2        | 1             | 1                | 2          | 2           | 2              | 2                | 2       | 2       | 2                | 2                  | 2                    |
| PCDH11X        | 0           | 1        | 3                 | 1         | 2        | 3             | 2                | 4          | 4           | 4              | 4                | 3       | 2       | 2                | 2                  | 2                    |
| PIK3R6         | 0           | 1        | 4                 | 3         | 2        | 2             | 2                | 3          | 2           | 3              | 2                | 2       | 2       | 2                | 2                  | 2                    |
| FAM35BP        | 1           | 1        | 1                 | 1         | 1        | 1             | 1                | 1          | 1           | 1              | 1                | 2       | 2       | 1                | 1                  | 1                    |
| MIR320A        | 3           | 3        | 3                 | 3         | 3        | 3             | 3                | 4          | 3           | 3              | 3                | 3       | 3       | 3                | 3                  | 3                    |
| TP53           | 2           | 2        | 3                 | 2         | 3        | 2             | 3                | 3          | 4           | 4              | 4                | 4       | 4       | 4                | 4                  | 4                    |

|   |        |
|---|--------|
| 0 | <5%    |
| 1 | 5-25%  |
| 2 | 25-50% |
| 3 | 50-75% |
| 4 | >75%   |

**Supplementary Table 11. Primer sequences**

| Gene                              | Left Primer                  | Right Primer               | Product size |
|-----------------------------------|------------------------------|----------------------------|--------------|
| ARID1A_ Exon 16                   | TGAGGGAAACATGAGCACTG         | GGAGGCAAAGAAACACAGGA       | 212          |
| ARID1A_ Exon 20                   | TTACACTCGCCAACATCTCG         | CACATTGTTGTCCTGGATGC       | 196          |
| BRAF_V600E                        | CCTAAACTCTTCATAATGCTTGCTC    | CCACAAAATGGATCCAGACA       | 189          |
| CDKN2A_ Exon 1                    | AGCACCGGAGGAAGAAAGAG         | AGCGCTACCTGATTCCAATTC      | 351          |
| CDKN2A_ Exon 2                    | GTGAGGGGGCTCTACACAAG         | ACCAGCGTGTCCAGGAAG         | 213          |
| CTCFMRE                           | AGCTCGATTTCCTGCAGA           | AAGCCTAAGTCCCCTACTGCC      | 197          |
| EFHC2                             | CATGGAGGGGAGTTTGTGGCC        | CCCCTTCTCTTGTATCATTGCTG    | 294          |
| ERBB2_ Exon19                     | CCCACGCTCTTCTCACTCAT         | AGAGACCAGAGCCCAGACCT       | 212          |
| ERBB2_ Exon20                     | GCTGTGGTTTTGTGATGGTTG        | TCCCGGACATGGTCTAAGAG       | 213          |
| FAM35BP                           | ATCCTCTCATGTCAGCCTCC         | CACGGGTGAGGTCATTATGG       | 449          |
| HS6ST3                            | GCTGGTGACCTTGCCTCTTA         | GGAGGAAGAGGAAGGGCAAT       | 193          |
| Intergenic variant chr1:101400874 | GGCTCCTGGACTTGAACCTCT        | GACCATTGTGAGGAAGGTCTG      | 162          |
| Intergenic variant chr11:54014453 | GAGGCCTTCGGTGGAAAAG          | GCTTCCGTGTAGTTCTGGGA       | 390          |
| Intergenic variant chr8:114907557 | TGTCTTTCATGGCACTGGTAT        | GGGAATGCAGATCAGTTGATGG     | 275          |
| KRAS_codons12/13                  | AGGCCTGCTGAAAATGACTG         | CATGAAAATGGTCAGAGAAAACC    | 205          |
| LOC105372877                      | AGCCACTCTTTCATCCTCC          | AATAGTAGCCGGGCTGG          | 533          |
| LOC105377582                      | TAAGTTTCTGTGGCCTCCC          | TTCCCGCATCTTCTGTCTT        | 247          |
| MIR320A                           | TGGGCTCAATCGATCCTCTC         | TGAGATTGCGCTGGAGTGTA       | 246          |
| NFIB                              | CAGCCTGAGAGAAATGCTGC         | TGAGAGGAGGAAGTAGCAAGG      | 202          |
| NINL                              | TAAAGGGACAGGAAGGGCAG         | CCTAGGTGGAAGCAGTCACA       | 178          |
| PCDH11X                           | CAGGCAAAGGTAGGCAGGAA         | GAGAGAAGCTATCCAAGGCAGT     | 223          |
| PIK3CA_ Exon 20                   | CTCTGGAATGCCAGAACTAC         | ATGCTGTTAATTGTGTGGAAG      | 175          |
| PIK3CA_ Exon 9                    | CAGAGTAACAGACTAGCTAGAGAC     | CCACAAATATCAATTTACAACCATTG | 309          |
| PIK3R6                            | TCACCCAAAACCTTGCAAGC         | GCTTTGCAGTCTTGTGTAATTGT    | 296          |
| RNF43_ Exon 10                    | CCTCTCAGCCACTCTGCTGC         | GACTCTGTGCCAGGTAGGG        | 201          |
| RNF43_ Exon 2                     | CCTGCATTTGGTATTAGCTAGTGG     | GCAGTAGAAGCCCGTGTATGG      | 416          |
| RNF43_ Exon 3                     | CTCACAGCTCACTCCTGCTG         | ACATGGGGACAAGAGAGCAC       | 268          |
| RNF43_ Exon 4                     | ATGTGTGAGGGGTGAGGCTA         | GTGACTTCTCCCTGCCCTTC       | 246          |
| RNF43_ Exon 5                     | CTCAGGGGAGAGGGAAGG           | TGCCACAGGACAAAGTAGGG       | 254          |
| RNF43_ Exon 6                     | CGAATTGACCCAGCTCATCC         | TCCTTCTTCTCCCTAACCCAC      | 237          |
| RNF43_ Exon 7                     | CAAGCTTGGGTCCAGAGAGG         | CTCCCCAGCTTCAATCTCC        | 291          |
| RNF43_ Exon 8                     | CCTGGCAATTCCTATGGCTA         | CCAAAGGGAAGCCACATTC        | 226          |
| RNF43_ Exon 9A                    | GAGCTCACAGGCTACTCAGG         | ATCTGCCAGGTACCCACTGC       | 540          |
| RNF43_ Exon 9B                    | CAGCACCCCTATGCACAAGG         | GAGGAATAGGAGGCCTGGAC       | 526          |
| RNF43_ Exon 9C                    | TCCTTGGACTCGGTGGTG           | GGACCAAGGATATGCCACAC       | 486          |
| RNF43_ Exon 9D                    | CAAAAATCCAGCCTCTCTGC         | GCTGTAGTCTCCTCTCCCTA       | 430          |
| RP11-40109.3 (myosin-13)          | CTGCCCGTTTCTGAGATGTG         | TGACTCCTCACTAACCCAGCG      | 176          |
| RP11-473J6.1                      | AGCCTGGAATCTCTTTGCT          | TTTGCCTCACAGTTCTGCAG       | 162          |
| SRGAP2B                           | TCTCACTCTATCACCAGGCTG        | AGGAGTTGAGATCATCCCG        | 202          |
| TP53_ Exon 4                      | CCTGGTCTCTGACTGCTCTTTTCACCCA | GGCCAGGCATTGAAGTCTCAT      | 363          |
| TP53_ Exon 5                      | CATTGTGCCCTGACTTTCA          | AACCAGCCCTGTCTGCTCT        | 267          |
| TP53_ Exon 6                      | AGAGACGACAGGGCTGGTTG         | CTTAACCCCTCCTCCAGAG        | 216          |
| TP53_ Exon 7                      | CCTGCTTGCCACAGGCTCT          | GTGTGCAGGGTGGCAAGT         | 201          |
| TP53_ Exon 8                      | TTTCCTTACTGCCTCTTGCTTC       | TAAGTGCACCCCTTGGTCTCC      | 227          |
| TP53_ Exon 9                      | GGAGACCAAGGGTGCAGTTATGCCTCAG | CCCAATTGCAGGTAACACAG       | 231          |
| TRAF3IP3                          | TGACTCCCACACCAATGACA         | TGGGGTCTCACTTTGTCCACC      | 325          |

## Supplementary References

1. Liu Y, Sethi NS, Hinoue T, Schneider BG, Cherniack AD, Sanchez-Vega F, et al. Comparative Molecular Analysis of Gastrointestinal Adenocarcinomas. *Cancer Cell*. 2018;33(4):721-35 e8.
2. Staaf J, Jonsson G, Ringner M, Vallon-Christersson J, Grabau D, Arason A, et al. High-resolution genomic and expression analyses of copy number alterations in HER2-amplified breast cancer. *Breast Cancer Res*. 2010;12(3):R25.
3. Wang YK, Bashashati A, Anglesio MS, Cochrane DR, Grewal DS, Ha G, et al. Genomic consequences of aberrant DNA repair mechanisms stratify ovarian cancer histotypes. *Nature genetics*. 2017;49(6):856-65.
