# Supplementary material for: The molecular origin and taxonomy of mucinous ovarian carcinoma
Source: PubMed Central journal article supplement (PMC6718426; doi:10.1038/s41467-019-11862-x), 2019-09-02
Supplement: 41467_2019_11862_MOESM3_ESM.pdf [file 41467_2019_11862_MOESM3_ESM.pdf]

## **Description of Additional Supplementary Files**

File Name: Supplementary Data 1

Description: Cohort information

File Name: Supplementary Data 2

Description: Genes targeted by validation sequencing panel

File Name: Supplementary Data 3

Description: Regions of copy number differentially affected by grade, stage, outcome and classification, plus source data for copy number variants

File Name: Supplementary Data 4

Description: Sequencing quality control metrics

File Name: Supplementary Data 5

Description: Variants from exome and validation sequencing

File Name: Supplementary Data 6

Description: MANTA output from WGS
